# Supplementary material for: Signature of ocean warming in global fisheries catch
Source: Springer Nature journal article supplement (doi:10.1038/nature12156), 2013-05-01
Supplement: 41586_2013_BFnature12156_MOESM109_ESM.pdf [file 41586_2013_BFnature12156_MOESM109_ESM.pdf]

**Fisheries landings and fishing effort data**

Landings data from the Sea Around Us Project originated from a range of sources including the Food and Agriculture Organization's (FAO) fisheries database supplemented by regional datasets, e.g., from International Council for the Exploration of the Sea (ICES) for Europe. It is quality-checked and mapped to a grid of 30' by 30' spatial cells using a rule-based approach based on original spatial information, the operation of fleets in the Exclusive Economic Zone of maritime countries (e.g., through documented access agreements) and the known habitat-driven distribution of the reported marine taxa.

Fishing effort data from the Sea Around Us Project were obtained from a range of public domain sources including FAO and the European Union for non-tuna fishing, the Secretariat of the Pacific Community, International Commission for the Conservation of Atlantic Tunas, Inter-American Tropical Tuna Commission, Indian Ocean Tuna Commission and FAO's Atlas of Tuna and Billfish for tuna fishing, and the Commission for the Conservation of Antarctic Marine Living Resources for fishing effort in the Antarctic region. The resultant harmonized global dataset were mapped to 30' by 30' spatial cells using a variety of processes depending on spatial information present in the original sources. Tuna and Commission for the Conservation of Antarctic Marine Living Resources (CCAMLR) data provided spatial information whereas those from FAO and the EU did not, and required further spatial modelling. Fishing effort was first apportioned to fleet-accessible ports then mapped to spatial cells in adjacent waters using a two-scale gravity-model based on the value of mapped landings taken from surrounding waters from the *Sea Around Us* project's fisheries landings databases.

Landings and effort data were re-aggregated to Large Marine Ecosystems from the spatial cell data. Sources of possible error associated with the original landings database include the misrepresentation of the quantity or taxonomic-identity of landings. The former was reduced through cross-checking different sources and the substitution of reconstructed data, where possible, based on local experts. Fixing errors or over-aggregation in the taxonomic-identity of landings required procedures that cross-checked with the reports of neighbouring countries. The taxonomic identification of landings greatly assisted mapping the landings data as much is known about the habitat, depth and current latitudinal constraints of commercial marine fauna, and where critical habitats, required depths, etc are located. Known fishing arrangements help to verify where fleets were fishing, for example, trade magazines often report fleet activities. Data associated with fishing effort still have quality problems<sup>1</sup> but these are partially mitigated by constraining fishing effort to areas where landings are extracted, that is, cross-validation with maps of fisheries landings. Some fisheries effort data, such as for global tuna fisheries, have relatively fine-scale spatial information that can be used to cross-check the mapping of fisheries landings.

### **Calculating species' temperature preference**

To calculate temperature preference for each species, we combined the predicted relative abundance with climatology (averaged of 1970 – 2000) of sea surface temperature (SST) data. First, relative abundance in each 30' latitude x 30' longitude was predicted using a species distribution modelling algorithm which relies on latitudinal and depth preferences, habitat association and known occurrence boundaries, but not SST<sup>(2,3)</sup>. The total relative abundance was normalized spatially so that the sum of relative abundance from all the cells was equivalent

to 1. Secondly, following the procedure documented in <sup>4,5</sup>, SST data were grouped into bins (i) with 1 °C increment. Thirdly, for each temperature bin, we calculated the total predicted relative abundance ( $K_i$ ) divided by the total range area of ocean within the temperature bin ( $A_i$ ). The temperature preference of the species in each temperature bin ( $p_i$ ) was calculated by normalizing the average relative abundance per unit area by their sum across all temperature bins:

$$p_i = (K_i/A_i) / \sum_i (K_i/A_i)$$

Thus, the available area of water within each temperature bin is accounted for in calculating the temperature preference of the species, and  $\sum_i p_i = 1$ . The temperatures corresponding to the median, 25<sup>th</sup> and 75<sup>th</sup> percentile values of the temperature preferences of the species were then calculated. The analysis was repeated with alternative SST climatology of 1951 – 1960 and 1991-2000, and using an alternative species distribution modelling approach.

### Statistical analysis of data

We accounted for the effects of fishing effort (*Effort*) and large-scale oceanographic changes (*OI*) on changes in MTC by using a generalized additive mixed model (GAMM). Firstly, we examined the time-lag in auto-correlation of the MTC time-series using the auto-correlation estimation function (acf) in R. MTC time-series from all LMEs have a significant time-lag of one year. Secondly, we obtained estimated fishing effort from 1970 to 2006<sup>1,6</sup>. Thirdly, we obtained indicators of large-scale oceanographic indices for each ocean basin. For LMEs in the Pacific Ocean, their relationship with the Pacific Decadal Oscillation was used (from [http://jisao.washington.edu/data\\_sets/pdo/#data](http://jisao.washington.edu/data_sets/pdo/#data)). For LMEs in the North and South Atlantic, the North Atlantic Oscillation Index (<http://ljp.lasg.ac.cn/dct/page/65574>) and South Atlantic Dipole Index (<http://ljp.lasg.ac.cn/dct/page/65592>) were used. For LMEs in the Indian Ocean, the Indian

Ocean Dipole Mode Index (from <http://www.jamstec.go.jp>) was used. For LMEs in the Arctic, the summer sea ice extent (from [http://www.ijis.iarc.uaf.edu/en/home/seaice\\_extent.htm](http://www.ijis.iarc.uaf.edu/en/home/seaice_extent.htm)) was used. For LMEs in the Southern Ocean, the Antarctic Oscillation Index (<http://www.lasg.ac.cn/staff/ljp/data-NAM-SAM-NAO/SAM%28AAO%29.htm>) was used. Each LME was assigned to its respective large-scale oceanographic indices (Table S1).

We accounted for the effects of fishing effort and large-scale oceanographic indices in each LME using the GAMM (R package MuMIn). We used a multi-model comparison framework (R package: MuMIn), with the full model being:  $MTC = s(Effort) + s(OI) + Year$ , with a temporal auto-correlation term (corAR1 function in R) where  $s$  represents a spline smoothing function, allowing for a lag of up to 3 years in the response of MTC to these two variables. Alternative models with either the *Effort* or *OI*, or both, removed from the model were tested and with and without the auto-correlation term. We calculated values of change in MTC based on the average value of the Year variable of the alternative GAMMs weighted by a factor calculated from the corresponding AICs. In addition, the best model is indicated by the lowest Akaike Information Criterion (AIC) (Table S1).

### **Determining the relationship between rates of changes in MTC and SST from 1970 to 2006**

We tested the hypothesis that the rate of change in MTC was significantly correlated with the rate of change of SST from 1970 to 2006. SST were regressed against time (accounting for temporal auto-correlation with including an AR term) using Generalized Least Square model (“gls” function in R), with the slopes representing the rate of changes of SST. Variation in the rate of change in MTC, calculated from the GAMMs (both model ensembles and best model),

between large marine ecosystems can be significantly explained by the rate of change in SST (Table S3). Overall, the relationship between rate of change of MTC and SST was robust to alternative methods of statistical inferences.

### **Determining the importance of different factors in explaining MTC changes**

Using the ‘model.avg’ function (package MuMIn) and the ‘Importance’ attribute of the function in R, we calculated the relative importance of each predictor variable expressed as sum of the Akaike weights over all of the models in which the parameter of interest appears. For comparison between variables, spline smoothing function was applied to all the three variables: fishing effort, large scale oceanographic index and SST. We then ranked the predictor variables according to their importance and summarized the ranks across Large Marine Ecosystems. Although fishing effort has a higher mean ranking, followed by Sea Surface Temperature (SST) and then large-scale oceanographic indices, these differences were not significant (Kruskal-Wallis rank sum test,  $p > 0.05$ ) (Figure S1).

### **Relationship between Maximum Size and Mean Temperature**

For each large marine ecosystem (LME) a linear regression was computed between the mean temperature preference of species and the log transformed maximum size of reported commercial taxa landed since the 1970s. The taxa were selected from the Sea Around Us project’s modelled fisheries landings data<sup>7</sup>. The maximum size was the maximum standard length for each taxon derived from data in online databases, mainly FishBase ([www.fishbase.org](http://www.fishbase.org)) and SeaLifeBase ([www.sealifebase.org](http://www.sealifebase.org)). The linear model (lm procedure in R) was:

$$Temperature_{50} = a \cdot \log_{10}(Size) + c$$

where *Temperature50* is the median of the temperature preference profile, *Size* is maximum body length and *a* and *c* are the slope and intercept of the linear model.

In 13 out of 52 LMEs,  $\log(\text{Size})$  was weakly and positively related to temperature while in 6 LMEs, the relationship was weakly negative. There was no significant relationship between  $\log(\text{Size})$  and temperature in 33 LMEs.

### **Testing for the potential effects of catch mis-reporting**

We tested the effects of catch misreporting, and the results confirmed our conclusion that misreporting is not correlated with temperature preference. We used published data of ‘reconstructed’ fisheries catch from 1970 to 2006 from five different areas, selected because they had publications documenting their reconstruction, all species in the reconstructed catch had a previously created distribution map (from which its temperature profile could be inferred), and which represented a range of habitats types and latitudes. These were: the Exclusive Economic Zones of Sabah, Malaysia, Poland<sup>8</sup>, American Samoa<sup>9</sup>, Guadeloupe<sup>10</sup> and St. Helena Island<sup>11</sup>. The reconstructed catch included the official FAO fisheries statistics supplemented with estimates of catches that are not reported in official statistics<sup>12</sup>.

We calculated MTC during this period using the official statistics only and with the reconstructed data. We found that rates of change in MTC were not significantly different between the datasets for Sabah, American Samoa, Guadeloupe and St Helena (ANCOVA  $p > 0.05$ ). Although the rate of change in MTC was significantly different in the case of Poland, MTCs calculated from both datasets showed a significant increase from 1970 to 2006. Thus, the qualitative trend is robust. This analysis shows that the admittedly strong misreporting of catch data does not affect our conclusions about changes in MTC.

### **Testing the potential effects of difference in temperature preferences between stocks**

While we acknowledge that different populations of marine fishes can have different preferred temperature (e.g., Atlantic cod), global fisheries catch data are not reported at stock (or population) level. In fisheries statistics in a Large Marine Ecosystem, for example, catches of Atlantic cod is not subdivided into different stocks (e.g., the Irish Sea stock or the North Sea stock). Also, population structure is only known for a very limited number of exploited species.

We used a simulation approach to examine the potential effects of this assumption on the conclusions related to the relationship between changes in mean temperature of the catch and sea water temperature. We simulated hypothetical data on a 1-dimensional array of 180 cells, each represented a 30 minute latitudinal zone from 0° (equator) to 90° (pole). We then randomly selected a temperature gradient from 0° C to 30° C that decreased from the equator to the pole. Moreover, we simulated 100 ‘species’ with randomly selected temperature tolerance limits. For each species, we randomly simulated up to 20 stocks with temperature tolerance limits that were randomly generated, but were within the upper and lower limits of the species. Optimal temperatures were assumed to be the midrange of the upper and lower limits. Using a triangular distribution (*dtriangle* function in *R*), with abundance being 1 at the optimal temperature while abundance decreases to 0 at upper and lower tolerance limits, we calculated the abundance of each stock in each 30 minute cell.

We assumed a linear warming across the simulated ocean at 0.01°C per year. We then calculated the abundance of each stock in each cell using the assigned temperature tolerance limits and optimal temperature assigned to each stock for a 30-year time frame.

Assuming that we did not know the stock structure, we calculated a median preferred temperature of each species by overlaying the sum of simulated abundance of all the stocks

within a species and the temperature in each. We then calculated the mean temperature of the catch at the species level in a latitudinal section (40° to 60°).

We repeated this simulation 1000 times. We also repeated the procedure above, but assumed that each species had a maximum number of stocks of: (i) 1 stock (i.e., species = stock), (ii) 5 stocks, (iii) 10 stocks and (iv) 15 stocks. We then tested the effects of the number of stocks on the slope of the calculated rate of change of Mean Temperature of the Catch using ANCOVA, with year as the main effect and number of stocks within a species as covariate.

Our results showed that the number of stocks did not affect the calculated rate of change of Mean Temperature of the Catch (i.e., slope,  $p > 0.1$ ). Increasing the number of stocks significantly increased the mean species level Mean Temperature of the Catch (i.e., intercept,  $p < 0.05$ ). Thus, the potential existence of different stocks will only change the absolute value of the calculated MTC, but it would not affect the rate of change of MTC – the latter is the focus of the analysis in this paper. This shows that our findings and conclusions on the rate of change of Mean Temperature of the Catch are robust to the possible stock structure (and their different temperature tolerance) of a species.

### **Testing sensitivity to method of inferring temperature preference**

We repeated the analysis using a subset of 698 species (fish only) with their temperature preference predicted from an alternative species distribution modelling approach called AquaMaps. This approach to modelling species' distributions uses simple, numerical descriptors of species relationships with environmental variables to predict distributions from occurrence databases. Environmental envelopes were calculated by associating occurrence data with current environmental variables to find the absolute and 'preferred' preference ranges (calculated as



shown in <sup>3,13</sup>). Predicted current distributions/ habitat suitability were generated multiplicatively from a suite of ‘environmental envelopes’ over each cell in a study area. Resulting cell values lie between 0 and 1 and represent the relative suitability of that cell for the specified species. The predicted current distributions for marine fishes were available through FishBase ([www.fishbase.org](http://www.fishbase.org)). Using predicted distribution from AquaMaps, we inferred temperature preference of each species and calculated the MTC changes in each LME using the same methodology as the main analysis. We tested whether using MTC calculated from different species distribution modelling approach, with the same subset of species, would have an effect on the relationship between change in MTC and SST across LMEs using ANCOVA. The analysis showed that species modelling approach had no effect on the relationship between MTC and SST changes ( $p > 0.05$ ).

Table S1. Average ranking of importance index calculated from multi-ensemble GAMM between MTC (Mean Temperature of the Catch), large-scale oceanographic index (OI), fishing effort (Effort) and SST (SST). Average ranking scales from 1 – 3, from least to most important. Oceanographic indices include: Pacific Oscillation Index (PDO), North Atlantic Oscillation Index (NAO), South Atlantic Dipole Index (SAD), Indian Ocean Dipole Mode Index (IDM), Summer Arctic Sea Ice (ASI) and Antarctic Oscillation Index (AOI).

| Large Marine Ecosystems          | Index used | Effort | OI  | SST |
|----------------------------------|------------|--------|-----|-----|
| East Bering Sea                  | PDO        | 3.0    | 1.7 | 1.3 |
| Gulf of Alaska                   | PDO        | 1.3    | 2.3 | 2.3 |
| California Current               | PDO        | 2.0    | 1.0 | 3.0 |
| Gulf of California               | PDO        | 1.5    | 2.0 | 2.5 |
| Gulf of Mexico                   | NAO        | 2.0    | 1.7 | 2.3 |
| Southeast U.S. Continental Shelf | NAO        | 2.7    | 1.7 | 1.7 |
| Northeast U.S. Continental Shelf | NAO        | 2.0    | 3.0 | 1.0 |
| Scotian Shelf                    | NAO        | 1.0    | 2.3 | 2.7 |
| Newfoundland-Labrador Shelf      | NAO        | 2.7    | 2.0 | 1.3 |
| Insular Pacific-Hawaiian         | PDO        | 2.3    | 2.7 | 1.0 |
| Pacific Central-American         | PDO        | 3.0    | 1.7 | 1.3 |
| Caribbean Sea                    | NAO        | 1.0    | 2.0 | 3.0 |
| Humboldt Current                 | PDO        | 1.3    | 1.7 | 3.0 |
| Patagonian Shelf                 | SAD        | 3.0    | 1.0 | 2.0 |
| South Brazil Shelf               | SAD        | 1.3    | 2.0 | 2.7 |
| East Brazil Shelf                | SAD        | 3.0    | 1.0 | 2.0 |
| North Brazil Shelf               | SAD        | 3.0    | 2.0 | 1.0 |
| West Greenland Shelf             | ASI        | 3.0    | 1.3 | 1.7 |
| East Greenland Shelf             | ASI        | 2.7    | 2.3 | 1.0 |
| Barents Sea                      | ASI        | 2.0    | 1.0 | 3.0 |
| Norwegian Sea                    | ASI        | 1.7    | 1.3 | 3.0 |
| North Sea                        | NAO        | 1.0    | 2.7 | 2.3 |
| Baltic Sea                       | NAO        | 3.0    | 1.0 | 2.0 |
| Celtic-Biscay Shelf              | NAO        | 3.0    | 1.0 | 2.0 |
| Iberian Coastal                  | NAO        | 3.0    | 1.0 | 2.0 |
| Mediterranean                    | -          | 3.0    | 0.0 | 1.0 |
| Canary Current                   | SAD        | 1.0    | 2.3 | 2.7 |
| Guinea Current                   | SAD        | 1.3    | 1.7 | 3.0 |
| Benguela Current                 | SAD        | 1.3    | 2.0 | 2.7 |
| Agulhas Current                  | IDM        | 3.0    | 1.0 | 2.0 |
| Somali Coastal Current           | IDM        | 1.7    | 1.3 | 3.0 |

| <b>Large Marine Ecosystems</b> | <b>Index used</b> | <b>Effort</b> | <b>OI</b> | <b>SST</b> |
|--------------------------------|-------------------|---------------|-----------|------------|
| Arabian Sea                    | IDM               | 3.0           | 1.0       | 2.0        |
| Red Sea                        | IDM               | 2.0           | 1.0       | 3.0        |
| Bay of Bengal                  | IDM               | 2.7           | 2.0       | 1.3        |
| Gulf of Thailand               | IDM               | 2.3           | 2.7       | 1.0        |
| South China Sea                | PDO               | 2.0           | 2.0       | 2.0        |
| Sulu-Celebes Sea               | PDO               | 2.7           | 2.3       | 1.0        |
| Indonesian Sea                 | PDO               | 2.7           | 1.7       | 1.7        |
| North Australia                | PDO               | 1.7           | 1.3       | 3.0        |
| Northeast Australia            | PDO               | 1.5           | 1.5       | 3.0        |
| East-Central Australia         | PDO               | 3.0           | 1.7       | 1.3        |
| Southeast Australia            | AOI               | 1.0           | 3.0       | 2.0        |
| Southwest Australia            | AOI               | 2.0           | 3.0       | 1.0        |
| West-Central Australia         | PDO               | 1.0           | 3.0       | 2.0        |
| Northwest Australia            | PDO               | 2.7           | 1.7       | 1.7        |
| New Zealand Shelf              | AOI               | 3.0           | 2.0       | 1.0        |
| East China Sea                 | PDO               | 3.0           | 1.5       | 1.5        |
| Yellow Sea                     | PDO               | 2.0           | 3.0       | 1.0        |
| Kuroshio Current               | PDO               | 3.0           | 1.0       | 2.0        |
| Sea of Japan/East Sea          | PDO               | 1.0           | 2.5       | 2.5        |
| Oyashio Current                | PDO               | 3.0           | 1.5       | 1.5        |
| Sea of Okhotsk                 | PDO               | 3.0           | 1.3       | 1.7        |

Table S2. Test statistics of GLM between rate of change of MTC and SST: (left column) all 52 LMEs and MTC changes estimated from model ensemble mean weighted by a factor calculated from the model's AICs, (middle column) all the 52 LMEs and MTC changes estimated from the model with lowest AIC, and (right column) test statistics with model ensemble for tropical LMEs only.

|                     | All LMEs<br>Model ensemble<br>(AIC-weighted) |          | All LMEs<br>Best model<br>(lowest AIC) |          | Tropical LMEs<br>Model ensemble<br>(AIC-weighted) |       |
|---------------------|----------------------------------------------|----------|----------------------------------------|----------|---------------------------------------------------|-------|
|                     | Intercept                                    | Slope    | Intercept                              | Slope    | Intercept                                         | Slope |
| <b>Estimate</b>     | -0.016                                       | 2.032    | -0.017                                 | 2.093    | -0.0151                                           | 1.825 |
| <b>Std. Error</b>   | 0.011                                        | 0.579    | 0.012                                  | 0.576    | 0.0213                                            | 1.575 |
| <b>t value</b>      | -1.439                                       | 3.511    | -1.461                                 | 3.511    | -0.711                                            | 1.158 |
| <b>P-value</b>      | 0.156                                        | 0.000956 | 0.150                                  | 0.000959 | 0.490                                             | 0.268 |
| <b>Significance</b> | NS                                           | ***      | NS                                     | ***      | NS                                                | NS    |

Table S3. Test statistics of ANCOVA examining the effects of year of SST climatology on the relationship between changes in MTC and SST for all 52 LME. \*\*\* - significant at 0.01 level; NS – not significant at 0.05 level.

| <b>Factors</b>         | <b>Sum sq.</b>  | <b>Mean sq.</b> | <b>F value</b> | <b>p-value</b>        |
|------------------------|-----------------|-----------------|----------------|-----------------------|
| Climatology period     | 0.00007         | 0.000035        | 0.0216         | 0.9786 (NS)           |
| <b>SST</b>             | <b>0.060198</b> | <b>0.060198</b> | <b>36.9633</b> | <b>&lt;0.00001***</b> |
| Climatology period*SST | 0.000025        | 0.000013        | 0.0078         | 0.9923 (NS)           |

Table S4. Test statistics of ANCOVA of changes in MTC anomalies over time (Year) calculated from two different datatypes (Datatype): catch data and survey data. \*\*\* significant at 0.005 level, NS – not significant at 0.05 level.

|               | Value   | Std. Error | t-value | p-value    |
|---------------|---------|------------|---------|------------|
| Intercept     | -106.87 | 33.54      | -3.19   | 0.0022***  |
| Year          | 0.054   | 0.017      | 3.189   | 0.0021***  |
| Datatype      | 70.588  | 54.437     | 1.297   | 0.199 (NS) |
| Datatype*Year | -0.036  | 0.027      | -1.298  | 0.198 (NS) |

Table S5. Inferred temperature preference for each species. TP50, TP25 and TP75 represent median, 25 percentile and 75 percentile temperature preference (°C), respectively.

| Scientific name                  | Common name           | TP50 | TP25 | TP75 |
|----------------------------------|-----------------------|------|------|------|
| <i>Ablennes hians</i>            | Psetta maxima         | 27   | 26   | 28   |
| <i>Abudefduf luridus</i>         | Canary damsel         | 20   | 19   | 20   |
| <i>Acanthistius brasilianus</i>  | Sea bass              | 14   | 13   | 16   |
| <i>Acanthocybium solandri</i>    | Wahoo                 | 26   | 25   | 28   |
| <i>Acanthopagrus berda</i>       | Picnic seabream       | 27   | 25   | 29   |
| <i>Acanthopagrus bifasciatus</i> | Twobar seabream       | 27   | 26   | 28   |
| <i>Acanthopagrus latus</i>       | Yellowfin seabream    | 27   | 26   | 29   |
| <i>Acanthopagrus schlegeli</i>   | Black porgy           | 17   | 16   | 20   |
| <i>Acanthurus sohal</i>          | Sohal surgeonfish     | 27   | 26   | 27   |
| <i>Acetes japonicus</i>          | Akiami paste shrimp   | 25   | 23   | 28   |
| <i>Aethaloperca rogae</i>        | Redmouth grouper      | 27   | 26   | 29   |
| <i>Albula vulpes</i>             | Bonefish              | 27   | 25   | 28   |
| <i>Alectis alexandrinus</i>      | African threadfish    | 24   | 21   | 26   |
| <i>Alepes djedaba</i>            | Shrimp scad           | 27   | 26   | 29   |
| <i>Alepocephalus bairdii</i>     | Bairds smooth-head    | 12   | 7    | 17   |
| <i>Alepocephalus rostratus</i>   | Rissos smooth-head    | 19   | 17   | 21   |
| <i>Allocyttus niger</i>          | Black oreo            | 8    | 5    | 10   |
| <i>Alopias superciliosus</i>     | Bigeye thresher       | 27   | 25   | 28   |
| <i>Alopias vulpinus</i>          | Thintail thresher     | 25   | 21   | 28   |
| <i>Alosa aestivalis</i>          | Blueback shad         | 14   | 11   | 18   |
| <i>Alosa alosa</i>               | Allis shad            | 15   | 12   | 18   |
| <i>Alosa fallax</i>              | Twaite shad           | 15   | 12   | 18   |
| <i>Alosa mediocris</i>           | Hickory shad          | 18   | 14   | 21   |
| <i>Alosa pontica</i>             | Pontic shad           | 13   | 13   | 14   |
| <i>Alosa pseudoharengus</i>      | Alewife               | 8    | 6    | 11   |
| <i>Alosa sapidissima</i>         | American shad         | 11   | 8    | 14   |
| <i>Amblyraja hyperborea</i>      | Arctic skate          | 10   | 5    | 15   |
| <i>Ammodytes personatus</i>      | Pacific sandeel       | 14   | 11   | 16   |
| <i>Anadara granosa</i>           | Blood cockle          | 28   | 27   | 28   |
| <i>Anarhichas denticulatus</i>   | Northern wolffish     | 6    | 2    | 9    |
| <i>Anarhichas lupus</i>          | Wolf-fish             | 8    | 5    | 10   |
| <i>Anarhichas minor</i>          | Spotted wolffish      | 5    | 2    | 8    |
| <i>Anchoa hepsetus</i>           | Broad-striped anchovy | 25   | 23   | 27   |
| <i>Anchoa mitchilli</i>          | Bay anchovy           | 23   | 20   | 25   |

| Scientific name                    | Common name               | TP50 | TP25 | TP75 |
|------------------------------------|---------------------------|------|------|------|
| <i>Anodontostoma chacunda</i>      | Chacunda gizzard shad     | 28   | 28   | 28   |
| <i>Anoplopoma fimbria</i>          | Sablefish                 | 11   | 7    | 15   |
| <i>Anthias anthias</i>             | Swallowtail seaperch      | 20   | 18   | 23   |
| <i>Antimora rostrata</i>           | Blue antimora             | 25   | 21   | 28   |
| <i>Aphanopus carbo</i>             | Black scabbardfish        | 11   | 7    | 15   |
| <i>Aphanopus intermedius</i>       | Intermediate scabbardfish | 25   | 22   | 27   |
| <i>Aphareus rutilans</i>           | Rusty jobfish             | 27   | 26   | 29   |
| <i>Apostichopus japonicus</i>      | Japanese sea cucumber     | 17   | 14   | 21   |
| <i>Archosargus probatocephalus</i> | Sheepshead seabream       | 26   | 24   | 28   |
| <i>Arctica islandica</i>           | Ocean quahog              | 8    | 5    | 11   |
| <i>Arctoscopus japonicus</i>       | Sailfin sandfish          | 5    | 4    | 8    |
| <i>Argentina silus</i>             | Greater argentine         | 7    | 3    | 10   |
| <i>Argentina sphyraena</i>         | Argentine                 | 16   | 12   | 19   |
| <i>Argopecten circularis</i>       | Pacific calico scallop    | 26   | 23   | 28   |
| <i>Argopecten gibbus</i>           | Calico scallop            | 25   | 23   | 27   |
| <i>Argopecten irradians</i>        | Atlantic bay scallop      | 19   | 13   | 24   |
| <i>Argopecten purpuratus</i>       | Peruvian calico scallop   | 21   | 20   | 22   |
| <i>Argyrops spinifer</i>           | King soldierbream         | 27   | 27   | 28   |
| <i>Argyrosomus hololepidotus</i>   | Southern meagre           | 25   | 23   | 27   |
| <i>Argyrosomus regius</i>          | Meagre                    | 19   | 16   | 21   |
| <i>Argyrozona argyrozona</i>       | Carpenter seabream        | 19   | 18   | 20   |
| <i>Ariomma indica</i>              | Indian ariomma            | 27   | 26   | 29   |
| <i>Aristeus antennatus</i>         | Blue and red shrimp       | 19   | 19   | 20   |
| <i>Aristeus varidens</i>           | Striped red shrimp        | 26   | 25   | 27   |
| <i>Arius thalassinus</i>           | Giant seacatfish          | 27   | 26   | 28   |
| <i>Arripis georgianus</i>          | Australian ruff           | 17   | 16   | 18   |
| <i>Arripis trutta</i>              | Eastern Australian salmon | 16   | 15   | 17   |
| <i>Artemesia longinaris</i>        | Argentine stiletto shrimp | 16   | 14   | 19   |
| <i>Atheresthes stomias</i>         | Arrowtooth flounder       | 8    | 4    | 13   |
| <i>Atherina boyeri</i>             | Big-scale sand smelt      | 14   | 11   | 17   |
| <i>Atherina presbyter</i>          | Sand smelt                | 16   | 13   | 18   |
| <i>Atractoscion aequidens</i>      | Geelbeck croaker          | 27   | 25   | 29   |
| <i>Atractoscion nobilis</i>        | White weakfish            | 15   | 12   | 20   |
| <i>Atrobucca nibe</i>              | Longfin kob               | 28   | 27   | 28   |
| <i>Atule mate</i>                  | Yellowtail scad           | 27   | 27   | 28   |
| <i>Aulacomya ater</i>              | Cholga mussel             | 14   | 12   | 16   |
| <i>Austroglossus microlepis</i>    | West coast sole           | 17   | 17   | 18   |
| <i>Austroglossus pectoralis</i>    | Mud sole                  | 21   | 18   | 23   |
| <i>Auxis rochei</i>                | Bullet tuna               | 27   | 26   | 28   |
| <i>Auxis thazard</i>               | Frigate tuna              | 27   | 25   | 28   |



| Scientific name                  | Common name               | TP50 | TP25 | TP75 |
|----------------------------------|---------------------------|------|------|------|
| <i>Balistes capriscus</i>        | Grey triggerfish          | 25   | 22   | 27   |
| <i>Bathyraja eatonii</i>         | Eatons skate              | 0    | -1   | 2    |
| <i>Bathyraja irrasa</i>          | Kerguelen sandpaper skate | 3    | 3    | 3    |
| <i>Bathyraja maccaini</i>        | McCains skate             | -2   | -2   | -1   |
| <i>Bathyraja meridionalis</i>    | Dark-belly skate          | 1    | 1    | 2    |
| <i>Bathyraja murrayi</i>         | Murrays skate             | 3    | 2    | 3    |
| <i>Belone belone</i>             | Garpike                   | 15   | 12   | 18   |
| <i>Benthalbella elongata</i>     | Benthalbella elongata     | 8    | 5    | 11   |
| <i>Benthoosema pterotum</i>      | Skinnycheek lanternfish   | 27   | 26   | 29   |
| <i>Beryx decadactylus</i>        | Alfonsino                 | 23   | 17   | 26   |
| <i>Beryx splendens</i>           | Splendid alfonsino        | 27   | 25   | 28   |
| <i>Bolbometopon muricatum</i>    | Green humphead parrotfish | 28   | 27   | 28   |
| <i>Boops boops</i>               | Bogue                     | 20   | 16   | 24   |
| <i>Boreogadus saida</i>          | Polar cod                 | 0    | -1   | 3    |
| <i>Borostomias antarcticus</i>   | Borostomias antarcticus   | 19   | 14   | 23   |
| <i>Bothus pantherinus</i>        | Leopard flounder          | 27   | 26   | 29   |
| <i>Brachydeuterus auritus</i>    | Bigeye grunt              | 26   | 25   | 27   |
| <i>Brama brama</i>               | Atlantic pomfret          | 24   | 20   | 27   |
| <i>Bregmaceros maclellandi</i>   | Spotted codlet            | 28   | 28   | 28   |
| <i>Brevoortia aurea</i>          | Brazilian menhaden        | 18   | 17   | 19   |
| <i>Brevoortia patronus</i>       | Gulf menhaden             | 24   | 24   | 26   |
| <i>Brevoortia pectinata</i>      | Argentine menhaden        | 17   | 16   | 18   |
| <i>Brevoortia tyrannus</i>       | Atlantic menhaden         | 18   | 14   | 22   |
| <i>Brosme brosme</i>             | Tusk                      | 9    | 7    | 10   |
| <i>Brotula barbata</i>           | Bearded brotula           | 27   | 26   | 28   |
| <i>Buccinum undatum</i>          | Whelk                     | 11   | 10   | 12   |
| <i>Callinectes danae</i>         | Dana's swimming crab      | 26   | 24   | 27   |
| <i>Callinectes sapidus</i>       | Blue crab                 | 25   | 22   | 27   |
| <i>Callista chione</i>           | Smooth callista           | 12   | 10   | 14   |
| <i>Callorhinchus capensis</i>    | Cape elephantfish         | 22   | 19   | 25   |
| <i>Callorhinchus milii</i>       | Ghost shark               | 15   | 13   | 15   |
| <i>Cancer borealis</i>           | Jonah crab                | 12   | 8    | 16   |
| <i>Cancer irroratus</i>          | Atlantic rock crab        | 21   | 17   | 25   |
| <i>Cancer magister</i>           | Dungeness crab            | 10   | 7    | 13   |
| <i>Cancer pagurus</i>            | Edible crab               | 14   | 11   | 16   |
| <i>Cancer productus</i>          | Pacific rock crab         | 10   | 7    | 13   |
| <i>Capromimus abbreviatus</i>    | Capro dory                | 11   | 10   | 13   |
| <i>Capros aper</i>               | Boarfish                  | 19   | 12   | 23   |
| <i>Carangoides bajad</i>         | Orangespotted trevally    | 28   | 28   | 28   |
| <i>Carangoides fulvoguttatus</i> | Yellowspotted trevally    | 28   | 27   | 29   |

| Scientific name                  | Common name               | TP50 | TP25 | TP75 |
|----------------------------------|---------------------------|------|------|------|
| <i>Carangoides malabaricus</i>   | Malabar trevally          | 27   | 26   | 29   |
| <i>Carangoides ruber</i>         | Bar jack                  | 25   | 23   | 27   |
| <i>Caranx crysos</i>             | Blue runner               | 25   | 24   | 27   |
| <i>Caranx hippos</i>             | Crevalle jack             | 27   | 26   | 28   |
| <i>Caranx ignobilis</i>          | Giant trevally            | 27   | 26   | 28   |
| <i>Caranx melampyngus</i>        | Bluefin trevally          | 28   | 27   | 28   |
| <i>Caranx rhonchus</i>           | False scad                | 24   | 21   | 26   |
| <i>Caranx sexfasciatus</i>       | Bigeye trevally           | 27   | 26   | 29   |
| <i>Carcharhinus brachyurus</i>   | Copper shark              | 26   | 23   | 28   |
| <i>Carcharhinus falciformis</i>  | Silky shark               | 26   | 25   | 28   |
| <i>Carcharhinus limbatus</i>     | Blacktip shark            | 27   | 26   | 28   |
| <i>Carcharhinus longimanus</i>   | Oceanic whitetip shark    | 27   | 26   | 28   |
| <i>Carcharhinus obscurus</i>     | Dusky shark               | 26   | 24   | 27   |
| <i>Carcharhinus plumbeus</i>     | Sandbar shark             | 26   | 25   | 28   |
| <i>Carcharhinus sorrah</i>       | Spottail shark            | 28   | 27   | 28   |
| <i>Carcharias taurus</i>         | Sand tiger shark          | 27   | 24   | 28   |
| <i>Carcharodon carcharias</i>    | Great white shark         | 24   | 20   | 27   |
| <i>Carcinus aestuarii</i>        | Mediterranean shore crab  | 19   | 18   | 20   |
| <i>Carcinus maenas</i>           | Green crab                | 13   | 9    | 16   |
| <i>Cardium edule</i>             | Common edible cockle      | 10   | 8    | 13   |
| <i>Caulolatilus chrysops</i>     | Atlantic goldeye tilefish | 27   | 26   | 27   |
| <i>Caulolatilus princeps</i>     | Ocean whitefish           | 27   | 25   | 28   |
| <i>Centriscoops humerosus</i>    | Banded yellowfish         | 17   | 17   | 18   |
| <i>Centroberyx affinis</i>       | Redfish                   | 18   | 17   | 19   |
| <i>Centrolophus niger</i>        | Blackfish                 | 19   | 15   | 23   |
| <i>Centrophorus granulosus</i>   | Gulper shark              | 24   | 21   | 26   |
| <i>Centrophorus lusitanicus</i>  | Lowfin gulper shark       | 27   | 26   | 28   |
| <i>Centrophorus squamosus</i>    | Leafscale gulper shark    | 22   | 18   | 25   |
| <i>Centropomus undecimalis</i>   | Common snook              | 27   | 27   | 27   |
| <i>Centropristis striata</i>     | Black seabass             | 19   | 14   | 23   |
| <i>Centroscyllum fabricii</i>    | Black dogfish             | 24   | 21   | 27   |
| <i>Centroscymnus coelolepis</i>  | Portuguese dogfish        | 20   | 16   | 23   |
| <i>Centroscymnus crepidater</i>  | Longnose velvet dogfish   | 23   | 19   | 26   |
| <i>Cephalopholis argus</i>       | Peacock hind              | 27   | 26   | 29   |
| <i>Cephalopholis fulva</i>       | Coney                     | 27   | 26   | 27   |
| <i>Cephalopholis hemistiktos</i> | Yellowfin hind            | 26   | 26   | 27   |
| <i>Cephalopholis miniata</i>     | Coral hind                | 28   | 27   | 28   |
| <i>Cepola macrophthalmalma</i>   | Red bandfish              | 18   | 11   | 23   |
| <i>Cervimunida johni</i>         | Carrot Squat Lobster      | 13   | 12   | 14   |
| <i>Cetengraulis edentulus</i>    | Atlantic anchoveta        | 27   | 26   | 28   |

| Scientific name                   | Common name               | TP50 | TP25 | TP75 |
|-----------------------------------|---------------------------|------|------|------|
| <i>Cetengraulis mysticetus</i>    | Pacific anchoveta         | 27   | 24   | 28   |
| <i>Cetorhinus maximus</i>         | Basking shark             | 18   | 13   | 21   |
| <i>Chaenocephalus aceratus</i>    | Blackfin icefish          | -1   | -1   | -1   |
| <i>Chaenodraco wilsoni</i>        | Spiny icefish             | -2   | -2   | -1   |
| <i>Champscephalus gunnari</i>     | Mackerel icefish          | -1   | -2   | 1    |
| <i>Channichthys rhinoceratus</i>  | Unicorn icefish           | 3    | 3    | 4    |
| <i>Cheilodactylus variegatus</i>  | Peruvian morwong          | 18   | 17   | 19   |
| <i>Cheilopogon agoo</i>           | Japanese flyingfish       | 24   | 23   | 25   |
| <i>Cheimerius nufar</i>           | Santer seabream           | 26   | 24   | 28   |
| <i>Chelidonichthys capensis</i>   | Cape gurnard              | 19   | 16   | 22   |
| <i>Chelidonichthys gurnardus</i>  | Grey gurnard              | 11   | 5    | 17   |
| <i>Chelidonichthys kumu</i>       | Bluefin gurnard           | 27   | 25   | 28   |
| <i>Chelidonichthys lastoviza</i>  | Streaked gurnard          | 18   | 14   | 22   |
| <i>Chelidonichthys lucerna</i>    | Tub gurnard               | 15   | 8    | 22   |
| <i>Chelon haematocheilus</i>      | So-iny (redlip) mullet    | 19   | 18   | 21   |
| <i>Chelon labrosus</i>            | Thicklip grey mullet      | 14   | 10   | 18   |
| <i>Chimaera monstrosa</i>         | Rabbit fish               | 12   | 7    | 18   |
| <i>Chione stutchburyi</i>         | Stutchbury's venus        | 15   | 13   | 16   |
| <i>Chionobathyscus dewitti</i>    | Chionobathyscus dewitti   | -2   | -2   | -1   |
| <i>Chionodraco myersi</i>         | Chionodraco myersi        | -2   | -2   | -2   |
| <i>Chionodraco rastrispinosus</i> | Ocellated icefish         | -1   | -2   | -1   |
| <i>Chionoecetes opilio</i>        | Queen crab                | 4    | 2    | 6    |
| <i>Chirocentrus dorab</i>         | Dorab wolf-herring        | 28   | 27   | 28   |
| <i>Chirocentrus nudus</i>         | Whitefin wolf-herring     | 28   | 26   | 29   |
| <i>Chlamys islandica</i>          | Iceland scallop           | 8    | 5    | 11   |
| <i>Chlamys opercularis</i>        | Queen scallop             | 12   | 11   | 13   |
| <i>Chlamys varia</i>              | Variegated scallop        | 17   | 14   | 20   |
| <i>Chloroscombrus chrysurus</i>   | Atlantic bumper           | 27   | 25   | 29   |
| <i>Chloroscombrus orqueta</i>     | Pacific bumper            | 22   | 17   | 25   |
| <i>Choromytilus chorus</i>        | Choro mussel              | 12   | 11   | 13   |
| <i>Chromis chromis</i>            | Damselfish                | 23   | 20   | 25   |
| <i>Chrysophrys auratus</i>        | Squirefish                | 27   | 25   | 28   |
| <i>Ciliata mustela</i>            | Fivebeard rockling        | 7    | 3    | 11   |
| <i>Citharichthys sordidus</i>     | Pacific sanddab           | 17   | 8    | 23   |
| <i>Citharus linguatula</i>        | Atlantic spotted flounder | 22   | 19   | 25   |
| <i>Clinocardium nuttallii</i>     | Nuttall cockle            | 7    | 5    | 10   |
| <i>Clupanodon thrissa</i>         | Chinese gizzard shad      | 27   | 26   | 28   |
| <i>Clupea harengus</i>            | Atlantic herring          | 8    | 5    | 11   |
| <i>Clupea harengus membras</i>    | Baltic herring            | 8    | 7    | 8    |
| <i>Clupea pallasii</i>            | Pacific herring           | 7    | 4    | 11   |

| Scientific name                  | Common name                     | TP50 | TP25 | TP75 |
|----------------------------------|---------------------------------|------|------|------|
| <i>Clupeonella cultriventris</i> | Black Sea sprat                 | 14   | 14   | 14   |
| <i>Cololabis saira</i>           | Pacific saury                   | 9    | 6    | 13   |
| <i>Concholepas concholepas</i>   | False abalone                   | 12   | 11   | 14   |
| <i>Conger conger</i>             | European conger                 | 16   | 9    | 22   |
| <i>Conger myriaster</i>          | Whitespotted conger             | 22   | 21   | 24   |
| <i>Conger oceanicus</i>          | American conger                 | 25   | 23   | 27   |
| <i>Conger orbignyanus</i>        | Argentine conger                | 23   | 18   | 25   |
| <i>Conodon nobilis</i>           | Barred grunt                    | 27   | 26   | 27   |
| <i>Coregonus albula</i>          | Vendace                         | 9    | 8    | 10   |
| <i>Coregonus lavaretus</i>       | Common whitefish                | 10   | 8    | 12   |
| <i>Coregonus oxyrinchus</i>      | Houting                         | 10   | 9    | 11   |
| <i>Coryphaena hippurus</i>       | Common dolphinfish              | 27   | 26   | 28   |
| <i>Coryphaenoides rupestris</i>  | Roundnose grenadier             | 10   | 6    | 13   |
| <i>Crangon crangon</i>           | Common shrimp                   | 11   | 9    | 14   |
| <i>Crassostrea gigas</i>         | Pacific cupped oyster           | 13   | 10   | 16   |
| <i>Crassostrea iredalei</i>      | Slipper cupped oyster           | 28   | 28   | 28   |
| <i>Crassostrea rhizophorae</i>   | Mangrove cupped oyster          | 27   | 27   | 27   |
| <i>Crassostrea virginica</i>     | American cupped oyster          | 24   | 22   | 27   |
| <i>Crenidens crenidens</i>       | Karenteen seabream              | 26   | 24   | 28   |
| <i>Cryodraco antarcticus</i>     | Cryodraco antarcticus           | -2   | -2   | -2   |
| <i>Ctenolabrus rupestris</i>     | Goldsinny-wrasse                | 11   | 7    | 15   |
| <i>Cyclopterus lumpus</i>        | Lumpsucker                      | 7    | 3    | 10   |
| <i>Cynoscion analis</i>          | Peruvian weakfish               | 25   | 22   | 27   |
| <i>Cynoscion nebulosus</i>       | Spotted weakfish                | 23   | 20   | 26   |
| <i>Cynoscion regalis</i>         | Gray weakfish                   | 15   | 12   | 18   |
| <i>Cynoscion striatus</i>        | South American striped weakfish | 16   | 15   | 17   |
| <i>Cyttus traversi</i>           | King dory                       | 18   | 17   | 20   |
| <i>Dalatias licha</i>            | Kitefin shark                   | 23   | 19   | 26   |
| <i>Dasyatis akajei</i>           | Red stingray                    | 28   | 26   | 29   |
| <i>Dasyatis centroura</i>        | Roughtail stingray              | 25   | 23   | 28   |
| <i>Dasyatis pastinaca</i>        | Common stingray                 | 21   | 17   | 25   |
| <i>Deania calcea</i>             | Birdbeak dogfish                | 20   | 17   | 23   |
| <i>Decapterus maruadsi</i>       | Japanese scad                   | 28   | 27   | 28   |
| <i>Decapterus russelli</i>       | Indian scad                     | 28   | 27   | 28   |
| <i>Dentex angolensis</i>         | Angola dentex                   | 28   | 26   | 29   |
| <i>Dentex congoensis</i>         | Congo dentex                    | 27   | 25   | 27   |
| <i>Dentex dentex</i>             | Common dentex                   | 19   | 17   | 20   |
| <i>Dentex macrophthalmus</i>     | Large-eye dentex                | 23   | 20   | 25   |
| <i>Dentex maroccanus</i>         | Morocco dentex                  | 19   | 17   | 21   |
| <i>Diagramma pictum</i>          | Painted sweetlips               | 28   | 27   | 28   |

| Scientific name                    | Common name                 | TP50 | TP25 | TP75 |
|------------------------------------|-----------------------------|------|------|------|
| <i>Diastobranchus capensis</i>     | Basketwork eel              | 17   | 15   | 19   |
| <i>Dicentrarchus labrax</i>        | European seabass            | 14   | 10   | 17   |
| <i>Dicentrarchus punctatus</i>     | Spotted seabass             | 18   | 16   | 20   |
| <i>Dicologlossa cuneata</i>        | Wedge sole                  | 27   | 25   | 28   |
| <i>Diplectrum formosum</i>         | Sand seabass                | 26   | 25   | 27   |
| <i>Diplodus annularis</i>          | Annular seabream            | 13   | 10   | 17   |
| <i>Diplodus argenteus</i>          | South American silver porgy | 27   | 26   | 27   |
| <i>Diplodus cervinus</i>           | Zebra seabream              | 21   | 18   | 24   |
| <i>Diplodus puntazzo</i>           | Sharpsnout seabream         | 23   | 20   | 25   |
| <i>Diplodus sargus</i>             | White seabream              | 22   | 19   | 25   |
| <i>Diplodus vulgaris</i>           | Common two-banded seabream  | 21   | 18   | 24   |
| <i>Dipturus batis</i>              | Blue skate                  | 19   | 17   | 20   |
| <i>Dipturus laevis</i>             | Barndoor skate              | 8    | 6    | 10   |
| <i>Dipturus linteus</i>            | Sailray                     | 6    | 3    | 9    |
| <i>Dipturus oxyrinchus</i>         | Longnosed skate             | 18   | 17   | 20   |
| <i>Dissostichus eleginoides</i>    | Patagonian toothfish        | 7    | 5    | 10   |
| <i>Dissostichus mawsoni</i>        | Antarctic toothfish         | -1   | -2   | -1   |
| <i>Dorosoma cepedianum</i>         | American gizzard shad       | 20   | 16   | 24   |
| <i>Dosidicus gigas</i>             | Jumbo flying squid          | 26   | 24   | 28   |
| <i>Dussumieria acuta</i>           | Rainbow sardine             | 28   | 28   | 28   |
| <i>Dussumieria elopsoidea</i>      | Slender rainbow sardine     | 28   | 27   | 28   |
| <i>Echinorhinus brucus</i>         | Bramble shark               | 26   | 23   | 28   |
| <i>Echinus esculentus</i>          | European edible sea urchin  | 11   | 9    | 13   |
| <i>Elagatis bipinnulata</i>        | Rainbow runner              | 27   | 26   | 28   |
| <i>Eledone cirrhosa</i>            | Horned octopus              | 18   | 16   | 20   |
| <i>Eleginops maclovinus</i>        | Patagonian blennie          | 8    | 8    | 9    |
| <i>Eleginus gracilis</i>           | Saffron cod                 | 5    | 3    | 7    |
| <i>Eleginus navaga</i>             | Navaga                      | 0    | -1   | 2    |
| <i>Eleutheronema tetradactylum</i> | Fourfinger threadfin        | 28   | 27   | 28   |
| <i>Elops lacerta</i>               | West African ladyfish       | 26   | 24   | 27   |
| <i>Elops saurus</i>                | Ladyfish                    | 27   | 27   | 27   |
| <i>Emmelichthys nitidus</i>        | Redbait                     | 26   | 24   | 28   |
| <i>Enchelyopus cimbrius</i>        | Fourbeard rockling          | 9    | 4    | 14   |
| <i>Engraulis anchoita</i>          | Argentine anchoita          | 15   | 12   | 19   |
| <i>Engraulis capensis</i>          | Cape anchovy                | 19   | 17   | 21   |
| <i>Engraulis encrasicolus</i>      | European anchovy            | 19   | 15   | 23   |
| <i>Engraulis japonicus</i>         | Japanese anchovy            | 23   | 19   | 26   |
| <i>Engraulis mordax</i>            | Californian anchovy         | 16   | 13   | 20   |
| <i>Engraulis ringens</i>           | Anchoveta                   | 17   | 15   | 19   |
| <i>Ensis directus</i>              | Atlantic razor clam         | 11   | 8    | 13   |

| Scientific name                  | Common name                | TP50 | TP25 | TP75 |
|----------------------------------|----------------------------|------|------|------|
| <i>Eopsetta jordani</i>          | Petrале sole               | 9    | 7    | 11   |
| <i>Epigonus telescopus</i>       | Bulls-eye                  | 19   | 18   | 21   |
| <i>Epinephelus aeneus</i>        | White grouper              | 27   | 25   | 28   |
| <i>Epinephelus analogus</i>      | Spotted grouper            | 28   | 27   | 28   |
| <i>Epinephelus areolatus</i>     | Areolate grouper           | 28   | 27   | 28   |
| <i>Epinephelus chlorostigma</i>  | Brownspotted grouper       | 28   | 27   | 28   |
| <i>Epinephelus coioides</i>      | Orange-spotted grouper     | 27   | 26   | 28   |
| <i>Epinephelus fasciatus</i>     | Blacktip grouper           | 27   | 26   | 28   |
| <i>Epinephelus flavolimbatus</i> | Yellowedge grouper         | 27   | 26   | 27   |
| <i>Epinephelus fuscoguttatus</i> | Brown-marbled grouper      | 28   | 27   | 28   |
| <i>Epinephelus goreensis</i>     | Dungat grouper             | 26   | 25   | 27   |
| <i>Epinephelus guttatus</i>      | Red hind                   | 26   | 25   | 27   |
| <i>Epinephelus marginatus</i>    | Dusky grouper              | 25   | 21   | 27   |
| <i>Epinephelus morio</i>         | Red grouper                | 27   | 25   | 28   |
| <i>Epinephelus morrhua</i>       | Comet grouper              | 28   | 27   | 28   |
| <i>Epinephelus multinotatus</i>  | White-blotched grouper     | 28   | 27   | 29   |
| <i>Epinephelus nigritus</i>      | Warsaw grouper             | 27   | 27   | 27   |
| <i>Epinephelus niveatus</i>      | Snowy grouper              | 26   | 25   | 28   |
| <i>Epinephelus polyphkadion</i>  | Camouflage grouper         | 27   | 26   | 29   |
| <i>Epinephelus striatus</i>      | Nassau grouper             | 27   | 26   | 27   |
| <i>Epinephelus summana</i>       | Summan grouper             | 26   | 25   | 28   |
| <i>Epinephelus tauvina</i>       | Greasy grouper             | 27   | 26   | 28   |
| <i>Erimacrus isenbeckii</i>      | Hair Crab                  | 7    | 3    | 11   |
| <i>Ethmalosa fimbriata</i>       | Bonga shad                 | 27   | 26   | 27   |
| <i>Ethmidium maculatum</i>       | Pacific menhaden           | 18   | 16   | 19   |
| <i>Etmopterus granulosus</i>     | Southern lanternshark      | 11   | 8    | 15   |
| <i>Etmopterus spinax</i>         | Velvet belly lantern shark | 24   | 21   | 27   |
| <i>Etrumeus teres</i>            | Round herring              | 25   | 21   | 27   |
| <i>Etrumeus whiteheadi</i>       | Whiteheads round herring   | 19   | 17   | 21   |
| <i>Euphausia superba</i>         | Antarctic krill            | -1   | -2   | -1   |
| <i>Euthynnus affinis</i>         | Kawakawa                   | 28   | 27   | 28   |
| <i>Euthynnus alletteratus</i>    | Little tunny               | 23   | 20   | 26   |
| <i>Euthynnus lineatus</i>        | Black skipjack             | 28   | 27   | 28   |
| <i>Fistularia tabacaria</i>      | Cornet fish                | 25   | 23   | 27   |
| <i>Gadus macrocephalus</i>       | Pacific cod                | 7    | 5    | 11   |
| <i>Gadus morhua</i>              | Atlantic cod               | 6    | 3    | 9    |
| <i>Gadus ogac</i>                | Greenland cod              | 5    | 2    | 10   |
| <i>Galeichthys feliceps</i>      | White baggar               | 24   | 22   | 26   |
| <i>Galeocerdo cuvier</i>         | Tiger shark                | 26   | 22   | 28   |
| <i>Galeoides decadactylus</i>    | Lesser African threadfin   | 26   | 25   | 27   |



| Scientific name                        | Common name             | TP50 | TP25 | TP75 |
|----------------------------------------|-------------------------|------|------|------|
| <i>Galeorhinus galeus</i>              | Tope shark              | 18   | 16   | 20   |
| <i>Galeus melastomus</i>               | Blackmouth catshark     | 17   | 11   | 22   |
| <i>Genyonemus lineatus</i>             | White croaker           | 14   | 11   | 17   |
| <i>Genypterus blacodes</i>             | Pink cusk-eel           | 15   | 12   | 17   |
| <i>Genypterus capensis</i>             | Kingklip                | 21   | 19   | 23   |
| <i>Genypterus chilensis</i>            | Red cusk-eel            | 24   | 22   | 26   |
| <i>Genypterus maculatus</i>            | Black cusk-eel          | 19   | 19   | 19   |
| <i>Gerres nigri</i>                    | Guinean striped mojarra | 26   | 25   | 27   |
| <i>Gerres oblongus</i>                 | Slender silverbidy      | 28   | 27   | 28   |
| <i>Gerres oyena</i>                    | Common silver-biddy     | 28   | 27   | 28   |
| <i>Geryon quinquedens</i>              | Red crab                | 23   | 17   | 26   |
| <i>Ginglymostoma cirratum</i>          | Nurse shark             | 27   | 26   | 28   |
| <i>Girella nigricans</i>               | Opaleye                 | 22   | 19   | 25   |
| <i>Girella tricuspidata</i>            | Luderick                | 16   | 15   | 17   |
| <i>Glycymeris glycymeris</i>           | Dog cockle              | 12   | 9    | 15   |
| <i>Glyptocephalus cynoglossus</i>      | Witch                   | 7    | 4    | 9    |
| <i>Glyptocephalus zachirus</i>         | Rex sole                | 7    | 4    | 10   |
| <i>Gnathanodon speciosus</i>           | Golden trevally         | 28   | 27   | 28   |
| <i>Gobionotothen acuta</i>             | Triangular notothen     | 3    | 2    | 4    |
| <i>Gobionotothen gibberifrons</i>      | Humped rockcod          | 3    | 0    | 6    |
| <i>Gobius niger</i>                    | Black goby              | 12   | 7    | 17   |
| <i>Grammoplites suppositus</i>         | Spotfin flathead        | 27   | 26   | 28   |
| <i>Gymnosarda unicolor</i>             | Dogtooth tuna           | 27   | 27   | 28   |
| <i>Gymnura altavela</i>                | Spiny butterfly ray     | 27   | 26   | 28   |
| <i>Halargyreus johnsonii</i>           | Slender codling         | 19   | 15   | 23   |
| <i>Haliotis gigantea</i>               | Giant abalone           | 18   | 16   | 20   |
| <i>Haliotis midae</i>                  | Perlemoen abalone       | 25   | 22   | 28   |
| <i>Haliotis rubra</i>                  | Blacklip abalone        | 15   | 15   | 17   |
| <i>Haliotis tuberculata</i>            | Tuberculate abalone     | 19   | 17   | 20   |
| <i>Haliporoides diomedea</i>           | Chilean nylon shrimp    | 22   | 19   | 25   |
| <i>Haliporoides sibogae</i>            | Jack-knife shrimp       | 26   | 25   | 28   |
| <i>Haliporoides triarthrus</i>         | Knife shrimp            | 21   | 19   | 24   |
| <i>Halobatrachus didactylus</i>        | Lusitanian toadfish     | 22   | 18   | 26   |
| <i>Harpadon nehereus</i>               | Bombay duck             | 28   | 27   | 29   |
| <i>Helicolenus dactylopterus</i>       | Blackbelly rosefish     | 22   | 18   | 26   |
| <i>Hemiramphus brasiliensis</i>        | Ballyhoo                | 26   | 24   | 28   |
| <i>Herklotsichthys quadrimaculatus</i> | Bluestripe herring      | 28   | 27   | 28   |
| <i>Heterocarpus reedi</i>              | Chilean nylon shrimp    | 14   | 14   | 15   |
| <i>Heterocarpus vicarius</i>           | Northern nylon shrimp   | 24   | 21   | 26   |
| <i>Hexanchus griseus</i>               | Bluntnose sixgill shark | 24   | 20   | 27   |

| Scientific name                                 | Common name                 | TP50 | TP25 | TP75 |
|-------------------------------------------------|-----------------------------|------|------|------|
| <i>Hilsa kelee</i>                              | Kelee shad                  | 28   | 28   | 28   |
| <i>Himantura gerrardi</i>                       | Sharpnose stingray          | 24   | 20   | 27   |
| <i>Hippoglossoides elassodon</i>                | Flathead sole               | 7    | 4    | 11   |
| <i>Hippoglossoides platessoides</i>             | American plaice             | 7    | 4    | 10   |
| <i>Hippoglossus hippoglossus</i>                | Atlantic halibut            | 7    | 4    | 11   |
| <i>Hippoglossus stenolepis</i>                  | Pacific halibut             | 6    | 4    | 8    |
| <i>Homarus americanus</i>                       | American lobster            | 8    | 6    | 10   |
| <i>Homarus gammarus</i>                         | European lobster            | 14   | 11   | 17   |
| <i>Hoplostethus atlanticus</i>                  | Orange roughy               | 18   | 15   | 20   |
| <i>Hoplostethus mediterraneus mediterraneus</i> | Mediterranean slimehead     | 22   | 17   | 26   |
| <i>Hydrolagus coliei</i>                        | Spotted ratfish             | 15   | 9    | 18   |
| <i>Hydrolagus mirabilis</i>                     | Large-eyed rabbitfish       | 22   | 17   | 25   |
| <i>Hydrolagus novaezealandiae</i>               | Dark ghost shark            | 15   | 13   | 16   |
| <i>Hyperoglyphe antarctica</i>                  | Antarctic butterfish        | 14   | 11   | 16   |
| <i>Hyperoglyphe bythites</i>                    | Black driftfish             | 27   | 26   | 27   |
| <i>Hypomesus pretiosus</i>                      | Surf smelt                  | 11   | 10   | 12   |
| <i>Hypoptychus dybowskii</i>                    | Korean sandeel              | 7    | 5    | 10   |
| <i>Hyporhamphus sajori</i>                      | Japanese halfbeak           | 27   | 26   | 29   |
| <i>Ibacus ciliatus</i>                          | Sand Crayfish               | 22   | 20   | 25   |
| <i>Ilisha africana</i>                          | West African ilisha         | 26   | 26   | 27   |
| <i>Ilisha elongata</i>                          | Elongate ilisha             | 23   | 18   | 26   |
| <i>Illex argentinus</i>                         | Argentine shortfin squid    | 10   | 8    | 12   |
| <i>Illex coindetii</i>                          | Broadtail shortfin squid    | 22   | 18   | 25   |
| <i>Illex illecebrosus</i>                       | Northern shortfin squid     | 17   | 12   | 21   |
| <i>Isacia conceptionis</i>                      | Cabinza grunt               | 26   | 23   | 28   |
| <i>Istiophorus albicans</i>                     | Atlantic sailfish           | 26   | 24   | 27   |
| <i>Istiophorus platypterus</i>                  | Indo-Pacific sailfish       | 26   | 24   | 28   |
| <i>Isurus oxyrinchus</i>                        | Shortfin mako               | 25   | 22   | 28   |
| <i>Isurus paucus</i>                            | Longfin mako                | 27   | 26   | 28   |
| <i>Jasus edwardsii</i>                          | Red rock lobster            | 15   | 14   | 17   |
| <i>Jasus frontalis</i>                          | Juan Fernandez rock lobster | 18   | 16   | 19   |
| <i>Jasus lalandii</i>                           | Cape rock lobster           | 17   | 16   | 18   |
| <i>Jasus novaehollandiae</i>                    | Southern rock lobster       | 15   | 15   | 15   |
| <i>Jasus verreauxi</i>                          | Green rock lobster          | 16   | 14   | 18   |
| <i>Joturus pichardi</i>                         | Bobo mullet                 | 27   | 26   | 27   |
| <i>Kathetostoma giganteum</i>                   | Giant stargazer             | 13   | 12   | 15   |
| <i>Katsuwonus pelamis</i>                       | Skipjack tuna               | 26   | 24   | 27   |
| <i>Konosirus punctatus</i>                      | Konoshiro gizzard shad      | 17   | 15   | 20   |
| <i>Kyphosus sectatrix</i>                       | Bermuda sea chub            | 26   | 25   | 27   |
| <i>Labrus bergylta</i>                          | Ballan wrasse               | 11   | 10   | 13   |



| Scientific name                    | Common name            | TP50 | TP25 | TP75 |
|------------------------------------|------------------------|------|------|------|
| <i>Lactarius lactarius</i>         | False trevally         | 28   | 27   | 28   |
| <i>Laemonema longipes</i>          | Longfin codling        | 7    | 5    | 11   |
| <i>Lamna nasus</i>                 | Porbeagle              | 16   | 10   | 19   |
| <i>Lampanyctodes hectoris</i>      | Hectors lanternfish    | 18   | 16   | 19   |
| <i>Lampris guttatus</i>            | Opah                   | 23   | 18   | 26   |
| <i>Larimichthys croceus</i>        | Large yellow croaker   | 23   | 20   | 25   |
| <i>Larimichthys polyactis</i>      | Yellow croaker         | 18   | 16   | 20   |
| <i>Lateolabrax japonicus</i>       | Japanese seaperch      | 26   | 24   | 28   |
| <i>Lates calcarifer</i>            | Barramundi             | 28   | 26   | 29   |
| <i>Leiostomus xanthurus</i>        | Spot croaker           | 23   | 20   | 26   |
| <i>Lepidocybium flavobrunneum</i>  | Escolar                | 26   | 24   | 28   |
| <i>Lepidonotothen larseni</i>      | Lepidonotothen larseni | 1    | -1   | 3    |
| <i>Lepidonotothen mizops</i>       | Toad notothen          | 4    | 3    | 5    |
| <i>Lepidonotothen nudifrons</i>    | Gaudy notothen         | -1   | -1   | -1   |
| <i>Lepidonotothen squamifrons</i>  | Grey rockcod           | 1    | 0    | 3    |
| <i>Lepidoperca pulchella</i>       | Orange perch           | 16   | 15   | 17   |
| <i>Lepidopsetta bilineata</i>      | Rock sole              | 5    | 4    | 9    |
| <i>Lepidopus caudatus</i>          | Silver scabbardfish    | 24   | 19   | 27   |
| <i>Lepidorhombus boscii</i>        | Fourspotted megrim     | 14   | 9    | 19   |
| <i>Lepidorhombus whiffiagonis</i>  | Megrim                 | 16   | 12   | 19   |
| <i>Lepidorhynchus denticulatus</i> | Thorntooth grenadier   | 15   | 13   | 17   |
| <i>Lepidotrigla cavillone</i>      | Large-scaled gurnard   | 21   | 18   | 24   |
| <i>Lethrinus atlanticus</i>        | Atlantic emperor       | 27   | 26   | 27   |
| <i>Lethrinus borbonicus</i>        | Snubnose emperor       | 27   | 27   | 28   |
| <i>Lethrinus harak</i>             | Thumbprint emperor     | 28   | 27   | 29   |
| <i>Lethrinus lentjan</i>           | Pink ear emperor       | 28   | 27   | 28   |
| <i>Lethrinus mahsena</i>           | Sky emperor            | 28   | 27   | 28   |
| <i>Lethrinus microdon</i>          | Smalltooth emperor     | 28   | 27   | 28   |
| <i>Lethrinus nebulosus</i>         | Spangled emperor       | 27   | 26   | 28   |
| <i>Lethrinus obsoletus</i>         | Orange-striped emperor | 28   | 27   | 28   |
| <i>Lethrinus xanthochilus</i>      | Yellowlip emperor      | 28   | 26   | 29   |
| <i>Leucoraja circularis</i>        | Sandy ray              | 8    | 5    | 12   |
| <i>Leucoraja erinacea</i>          | Little skate           | 12   | 10   | 13   |
| <i>Leucoraja fullonica</i>         | Shagreen ray           | 10   | 5    | 16   |
| <i>Leucoraja naevus</i>            | Cuckoo ray             | 17   | 11   | 22   |
| <i>Lichia amia</i>                 | Leerfish               | 26   | 24   | 28   |
| <i>Limanda aspera</i>              | Yellowfin sole         | 7    | 4    | 12   |
| <i>Limanda ferruginea</i>          | Yellowtail flounder    | 7    | 6    | 9    |
| <i>Limanda limanda</i>             | Dab                    | 10   | 9    | 12   |
| <i>Limulus polyphemus</i>          | Horseshoe crab         | 24   | 21   | 26   |

| Scientific name                      | Common name               | TP50 | TP25 | TP75 |
|--------------------------------------|---------------------------|------|------|------|
| <i>Liocarcinus depurator</i>         | Blue-leg swimcrab         | 15   | 12   | 18   |
| <i>Lithodes aequispina</i>           | Same-spine stone crab     | 7    | 5    | 9    |
| <i>Lithodes antarcticus</i>          | Southern king crab        | 9    | 8    | 11   |
| <i>Lithodes maia</i>                 | Stone king crab           | 5    | 3    | 9    |
| <i>Lithognathus lithognathus</i>     | White steenbras           | 20   | 18   | 24   |
| <i>Lithognathus mormyrus</i>         | Striped seabream          | 24   | 20   | 27   |
| <i>Littorina littorea</i>            | Common periwinkle         | 9    | 7    | 12   |
| <i>Liza aurata</i>                   | Golden grey mullet        | 16   | 13   | 19   |
| <i>Liza klunzingeri</i>              | Klunzingers mullet        | 27   | 26   | 27   |
| <i>Liza saliens</i>                  | Leaping mullet            | 11   | 6    | 15   |
| <i>Lobotes surinamensis</i>          | Atlantic tripletail       | 27   | 25   | 28   |
| <i>Loligo forbesii</i>               | Veined Squid              | 25   | 21   | 27   |
| <i>Loligo gahi</i>                   | Patagonian squid          | 11   | 8    | 14   |
| <i>Loligo opalescens</i>             | California market squid   | 15   | 13   | 18   |
| <i>Loligo pealeii</i>                | Longfin squid             | 21   | 11   | 25   |
| <i>Loligo vulgaris</i>               | Cape Hope squid           | 18   | 17   | 19   |
| <i>Lophius americanus</i>            | American angler           | 9    | 7    | 12   |
| <i>Lophius budegassa</i>             | Black-bellied angler      | 25   | 23   | 28   |
| <i>Lophius piscatorius</i>           | Angler                    | 14   | 10   | 17   |
| <i>Lophius vaillanti</i>             | Shortspine African angler | 25   | 23   | 27   |
| <i>Lophius vomerinus</i>             | Cape monk                 | 21   | 19   | 25   |
| <i>Lopholatilus chamaeleonticeps</i> | Great northern tilefish   | 25   | 22   | 28   |
| <i>Loxechinus albus</i>              | Chilean sea urchin        | 13   | 11   | 15   |
| <i>Lutjanus argentimaculatus</i>     | Mangrove red snapper      | 27   | 26   | 28   |
| <i>Lutjanus argentiventris</i>       | Yellow snapper            | 28   | 27   | 28   |
| <i>Lutjanus bohar</i>                | Two-spot red snapper      | 28   | 27   | 28   |
| <i>Lutjanus campechanus</i>          | Northern red snapper      | 24   | 21   | 27   |
| <i>Lutjanus gibbus</i>               | Humpback red snapper      | 28   | 27   | 28   |
| <i>Lutjanus johnii</i>               | Johns snapper             | 28   | 27   | 28   |
| <i>Lutjanus kasmira</i>              | Common bluestripe snapper | 27   | 26   | 29   |
| <i>Lutjanus malabaricus</i>          | Malabar blood snapper     | 28   | 27   | 28   |
| <i>Lutjanus purpureus</i>            | Southern red snapper      | 27   | 27   | 27   |
| <i>Lutjanus quinquelineatus</i>      | Five-lined snapper        | 27   | 26   | 29   |
| <i>Lutjanus synagris</i>             | Lane snapper              | 27   | 25   | 28   |
| <i>Macrodon ancylodon</i>            | King weakfish             | 26   | 25   | 28   |
| <i>Macroramphosus scolopax</i>       | Longspine snipefish       | 26   | 23   | 28   |
| <i>Macrourus berglax</i>             | Onion-eye grenadier       | 6    | 2    | 9    |
| <i>Macrourus holotrachys</i>         | Bigeye grenadier          | 9    | 7    | 12   |
| <i>Macruronus magellanicus</i>       | Patagonian grenadier      | 9    | 8    | 11   |
| <i>Macruronus novaezelandiae</i>     | Blue grenadier            | 13   | 11   | 15   |

| Scientific name                        | Common name                | TP50 | TP25 | TP75 |
|----------------------------------------|----------------------------|------|------|------|
| <i>Mactra sachalinensis</i>            | Hen clam                   | 18   | 12   | 22   |
| <i>Maja squinado</i>                   | Spinous spider crab        | 20   | 17   | 23   |
| <i>Makaira indica</i>                  | Black marlin               | 27   | 26   | 28   |
| <i>Makaira nigricans</i>               | Atlantic blue marlin       | 25   | 23   | 27   |
| <i>Mallotus villosus</i>               | Capelin                    | 3    | 1    | 5    |
| <i>Mancopsetta maculata antarctica</i> | Antarctic armless flounder | 3    | 2    | 4    |
| <i>Martialia hyadesi</i>               | Sevenstar flying squid     | 13   | 11   | 15   |
| <i>Maurolicus muelleri</i>             | Pearlsides                 | 22   | 16   | 26   |
| <i>Megabalanus psittacus</i>           | Giant barnacle             | 14   | 12   | 15   |
| <i>Megalaspis cordyla</i>              | Torpedo scad               | 28   | 27   | 28   |
| <i>Megalops atlanticus</i>             | Tarpon                     | 26   | 25   | 27   |
| <i>Megalops cyprinoides</i>            | Indo-Pacific tarpon        | 28   | 28   | 29   |
| <i>Meganctiphanes norvegica</i>        | Norwegian krill            | 7    | 3    | 11   |
| <i>Melanogrammus aeglefinus</i>        | Haddock                    | 7    | 5    | 10   |
| <i>Mene maculata</i>                   | Moonfish                   | 28   | 27   | 28   |
| <i>Menidia menidia</i>                 | Atlantic silverside        | 10   | 7    | 14   |
| <i>Menippe mercenaria</i>              | Black stone crab           | 24   | 22   | 26   |
| <i>Menticirrhus littoralis</i>         | Gulf kingcroaker           | 26   | 25   | 27   |
| <i>Menticirrhus saxatilis</i>          | Northern kingcroaker       | 26   | 24   | 28   |
| <i>Mercenaria mercenaria</i>           | Northern quahog            | 17   | 12   | 21   |
| <i>Meretrix lusoria</i>                | Japanese hard clam         | 17   | 15   | 19   |
| <i>Merlangius merlangus</i>            | Whiting                    | 11   | 9    | 14   |
| <i>Merluccius angustimanus</i>         | Panama hake                | 24   | 22   | 26   |
| <i>Merluccius australis</i>            | Southern hake              | 11   | 9    | 13   |
| <i>Merluccius bilinearis</i>           | Silver hake                | 7    | 5    | 10   |
| <i>Merluccius capensis</i>             | Shallow-water Cape hake    | 17   | 17   | 18   |
| <i>Merluccius gayi gayi</i>            | South Pacific hake         | 14   | 13   | 15   |
| <i>Merluccius hubbsi</i>               | Argentine hake             | 14   | 10   | 19   |
| <i>Merluccius merluccius</i>           | European hake              | 18   | 15   | 20   |
| <i>Merluccius polli</i>                | Benguela hake              | 26   | 25   | 27   |
| <i>Merluccius productus</i>            | North Pacific hake         | 15   | 13   | 18   |
| <i>Merluccius senegalensis</i>         | Senegalese hake            | 21   | 20   | 22   |
| <i>Mesodesma donacium</i>              | Macha clam                 | 17   | 15   | 19   |
| <i>Metanephrops andamanicus</i>        | Andaman lobster            | 28   | 28   | 28   |
| <i>Metanephrops challengerii</i>       | New Zealand lobster        | 14   | 13   | 16   |
| <i>Metanephrops mozambicus</i>         | Mozambique lobster         | 26   | 25   | 27   |
| <i>Metapenaeus endeavouri</i>          | Endeavour shrimp           | 27   | 26   | 28   |
| <i>Metapenaeus joyneri</i>             | Shiba shrimp               | 26   | 24   | 28   |
| <i>Metapenaeus monoceros</i>           | Speckled shrimp            | 27   | 26   | 29   |
| <i>Meuschenia scaber</i>               | Velvet leatherjacket       | 15   | 15   | 17   |

| Scientific name                     | Common name                  | TP50 | TP25 | TP75 |
|-------------------------------------|------------------------------|------|------|------|
| <i>Microchirus variegatus</i>       | Thickback sole               | 17   | 10   | 22   |
| <i>Microcosmus sulcatus</i>         | Grooved sea squirt           | 18   | 17   | 19   |
| <i>Microgadus proximus</i>          | Pacific tomcod               | 7    | 4    | 10   |
| <i>Microgadus tomcod</i>            | Atlantic tomcod              | 9    | 6    | 11   |
| <i>Micromesistius australis</i>     | Southern blue whiting        | 9    | 7    | 11   |
| <i>Micromesistius poutassou</i>     | Blue whiting                 | 15   | 10   | 19   |
| <i>Micropogonias furnieri</i>       | Whitemouth croaker           | 24   | 21   | 26   |
| <i>Micropogonias undulatus</i>      | Atlantic croaker             | 26   | 25   | 27   |
| <i>Microstomus kitt</i>             | Lemon sole                   | 6    | 3    | 10   |
| <i>Microstomus pacificus</i>        | Dover sole                   | 11   | 6    | 16   |
| <i>Miichthys miiuy</i>              | Mi-iuy croaker               | 23   | 22   | 24   |
| <i>Mobula mobular</i>               | Devil fish                   | 19   | 15   | 23   |
| <i>Mola mola</i>                    | Ocean sunfish                | 26   | 23   | 27   |
| <i>Molva dypterygia</i>             | Blue ling                    | 11   | 5    | 17   |
| <i>Molva molva</i>                  | Ling                         | 14   | 10   | 17   |
| <i>Monotaxis grandoculis</i>        | Humpnose big-eye bream       | 28   | 27   | 28   |
| <i>Mora moro</i>                    | Common mora                  | 23   | 19   | 26   |
| <i>Morone americana</i>             | White perch                  | 15   | 10   | 21   |
| <i>Morone saxatilis</i>             | Striped sea-bass             | 21   | 16   | 25   |
| <i>Mugil cephalus</i>               | Flathead mullet              | 27   | 25   | 28   |
| <i>Mugil liza</i>                   | Liza                         | 26   | 24   | 28   |
| <i>Mugil soiuy</i>                  | So-iuy mullet                | 11   | 7    | 13   |
| <i>Mulloidichthys flavolineatus</i> | Yellowstripe goatfish        | 27   | 26   | 29   |
| <i>Mullus argentinae</i>            | Argentine goatfish           | 20   | 17   | 23   |
| <i>Mullus barbatus</i>              | Red mullet                   | 17   | 12   | 22   |
| <i>Mullus surmuletus</i>            | Striped red mullet           | 19   | 13   | 23   |
| <i>Muraena helena</i>               | Mediterranean moray          | 20   | 14   | 24   |
| <i>Muraenesox cinereus</i>          | Daggertooth pike conger      | 28   | 27   | 28   |
| <i>Muraenolepis microps</i>         | Smalleye moray cod           | -1   | -2   | -1   |
| <i>Mustelus asterias</i>            | Starry smooth-hound          | 10   | 6    | 14   |
| <i>Mustelus henlei</i>              | Brown smooth-hound           | 27   | 26   | 28   |
| <i>Mustelus lenticulatus</i>        | Spotted estuary smooth-hound | 15   | 13   | 16   |
| <i>Mustelus mustelus</i>            | Smooth-hound                 | 26   | 23   | 28   |
| <i>Mustelus schmitti</i>            | Narrownose smooth-hound      | 13   | 12   | 16   |
| <i>Mya arenaria</i>                 | Sand gaper                   | 10   | 7    | 13   |
| <i>Mycteroperca bonaci</i>          | Black grouper                | 27   | 26   | 27   |
| <i>Mycteroperca microlepis</i>      | Gag                          | 26   | 24   | 27   |
| <i>Mycteroperca phenax</i>          | Scamp                        | 23   | 20   | 26   |
| <i>Mycteroperca venenosa</i>        | Yellowfin grouper            | 27   | 26   | 27   |
| <i>Mycteroperca xenarcha</i>        | Broomtail grouper            | 28   | 27   | 28   |

| Scientific name                  | Common name               | TP50 | TP25 | TP75 |
|----------------------------------|---------------------------|------|------|------|
| <i>Myliobatis aquila</i>         | Common eagle ray          | 26   | 23   | 28   |
| <i>Mytilus chilensis</i>         | Chilean mussel            | 12   | 9    | 14   |
| <i>Mytilus coruscus</i>          | Korean mussel             | 16   | 15   | 18   |
| <i>Mytilus edulis</i>            | Blue mussel               | 8    | 4    | 11   |
| <i>Mytilus galloprovincialis</i> | Mediterranean mussel      | 17   | 14   | 19   |
| <i>Mytilus planulatus</i>        | Australian mussel         | 26   | 23   | 28   |
| <i>Mytilus platensis</i>         | River Plata mussel        | 14   | 13   | 14   |
| <i>Myxine glutinosa</i>          | Hagfish                   | 11   | 6    | 17   |
| <i>Naso unicornis</i>            | Bluespine unicornfish     | 28   | 27   | 28   |
| <i>Necora puber</i>              | Velvet swimcrab           | 10   | 9    | 12   |
| <i>Nemadactylus bergi</i>        | White morwong             | 12   | 10   | 14   |
| <i>Nemadactylus macropterus</i>  | Tarakihi                  | 27   | 25   | 28   |
| <i>Nematalosa nasus</i>          | Blochs gizzard shad       | 25   | 22   | 28   |
| <i>Nematopalaemon schmitti</i>   | Whitebelly prawn          | 27   | 27   | 27   |
| <i>Nemipterus japonicus</i>      | Japanese threadfin bream  | 28   | 27   | 29   |
| <i>Nemipterus randalli</i>       | Randalls threadfin bream  | 28   | 27   | 28   |
| <i>Nemipterus virgatus</i>       | Golden threadfin bream    | 27   | 26   | 28   |
| <i>Neocyttus rhomboidalis</i>    | Spiky oreo                | 17   | 15   | 19   |
| <i>Neopagetopsis ionah</i>       | Bible icefish             | -2   | -2   | -1   |
| <i>Nephrops norvegicus</i>       | Norway lobster            | 17   | 14   | 20   |
| <i>Nezumia aequalis</i>          | Common Atlantic grenadier | 22   | 18   | 25   |
| <i>Nibea mitsukurii</i>          | Nibe croaker              | 21   | 20   | 22   |
| <i>Normanichthys crockeri</i>    | Normans camote            | 17   | 16   | 19   |
| <i>Notorynchus cepedianus</i>    | Broadnose sevengill shark | 18   | 16   | 22   |
| <i>Notothenia coriiceps</i>      | Yellowbelly rockcod       | 0    | -1   | 2    |
| <i>Notothenia rossii</i>         | Marbled rockcod           | 4    | 1    | 7    |
| <i>Nototodarus sloanii</i>       | Wellington flying squid   | 15   | 13   | 17   |
| <i>Oblada melanura</i>           | Saddled seabream          | 24   | 21   | 26   |
| <i>Octopus vulgaris</i>          | Common octopus            | 26   | 23   | 28   |
| <i>Ocyurus chrysurus</i>         | Yellowtail snapper        | 26   | 25   | 28   |
| <i>Odontesthes regia</i>         | Silverside                | 18   | 16   | 19   |
| <i>Ommastrephes bartramii</i>    | Neon flying squid         | 25   | 21   | 27   |
| <i>Oncorhynchus gorbuscha</i>    | Pink salmon               | 5    | 3    | 9    |
| <i>Oncorhynchus keta</i>         | Chum salmon               | 5    | 3    | 8    |
| <i>Oncorhynchus kisutch</i>      | Coho salmon               | 4    | 3    | 6    |
| <i>Oncorhynchus masou</i>        | Cherry salmon             | 8    | 5    | 13   |
| <i>Oncorhynchus mykiss</i>       | Rainbow trout             | 9    | 6    | 12   |
| <i>Oncorhynchus nerka</i>        | Sockeye salmon            | 4    | 3    | 6    |
| <i>Oncorhynchus tshawytscha</i>  | Chinook salmon            | 6    | 4    | 8    |
| <i>Ophiodon elongatus</i>        | Lingcod                   | 11   | 7    | 16   |

| Scientific name                     | Common name               | TP50 | TP25 | TP75 |
|-------------------------------------|---------------------------|------|------|------|
| <i>Opisthonema libertate</i>        | Pacific thread herring    | 27   | 25   | 28   |
| <i>Opisthonema oglinum</i>          | Atlantic thread herring   | 26   | 25   | 28   |
| <i>Orcynopsis unicolor</i>          | Plain bonito              | 18   | 17   | 20   |
| <i>Orthopristis chrysoptera</i>     | Pigfish                   | 24   | 22   | 27   |
| <i>Osmerus eperlanus</i>            | European smelt            | 10   | 9    | 11   |
| <i>Osmerus mordax</i>               | Atlantic rainbow smelt    | 3    | 1    | 5    |
| <i>Ostrea chilensis</i>             | Chilean flat oyster       | 25   | 21   | 27   |
| <i>Ostrea edulis</i>                | European flat oyster      | 15   | 12   | 18   |
| <i>Ostrea lurida</i>                | Olympia flat oyster       | 14   | 11   | 18   |
| <i>Ostrea lutaria</i>               | New Zealand dredge oyster | 14   | 12   | 16   |
| <i>Otolithes ruber</i>              | Tiger-toothed croaker     | 28   | 27   | 28   |
| <i>Oxynotus centrina</i>            | Angular roughshark        | 26   | 24   | 28   |
| <i>Oxynotus paradoxus</i>           | Sailfin roughshark        | 18   | 16   | 20   |
| <i>Pagellus acarne</i>              | Axillary seabream         | 19   | 18   | 20   |
| <i>Pagellus bellottii bellottii</i> | Red pandora               | 25   | 22   | 26   |
| <i>Pagellus bogaraveo</i>           | Blackspot seabream        | 18   | 16   | 20   |
| <i>Pagellus erythrinus</i>          | Common pandora            | 18   | 16   | 20   |
| <i>Pagrus auriga</i>                | Redbanded seabream        | 23   | 20   | 26   |
| <i>Pagrus caeruleostictus</i>       | Bluespotted seabream      | 23   | 20   | 26   |
| <i>Pagrus pagrus</i>                | Common seabream           | 25   | 21   | 27   |
| <i>Palaemon longirostris</i>        | Delta prawn               | 11   | 10   | 13   |
| <i>Palaemon serratus</i>            | Common prawn              | 17   | 14   | 19   |
| <i>Palinurus delagoae</i>           | Natal spiny lobster       | 25   | 24   | 26   |
| <i>Palinurus elephas</i>            | Common spiny lobster      | 13   | 10   | 17   |
| <i>Palinurus gichristi</i>          | Southern spiny lobster    | 18   | 16   | 21   |
| <i>Palinurus mauritanicus</i>       | Pink spiny lobster        | 18   | 17   | 19   |
| <i>Pampus argenteus</i>             | Silver pomfret            | 26   | 23   | 28   |
| <i>Pandalopsis japonica</i>         | Sidestripe shrimp         | 8    | 5    | 13   |
| <i>Pandalus borealis</i>            | Northern prawn            | 5    | 3    | 9    |
| <i>Pandalus goniurus</i>            | Humpy shrimp              | 4    | 3    | 6    |
| <i>Pandalus hypsinotus</i>          | Humpback shrimp           | 7    | 4    | 10   |
| <i>Pandalus kessleri</i>            | Grass shrimp              | 5    | 4    | 7    |
| <i>Pandalus montagui</i>            | Aesop shrimp              | 6    | 2    | 9    |
| <i>Panopea abrupta</i>              | Pacific geoduck           | 8    | 6    | 10   |
| <i>Panulirus argus</i>              | Caribbean spiny lobster   | 27   | 26   | 27   |
| <i>Panulirus cygnus</i>             | Australian spiny lobster  | 21   | 20   | 22   |
| <i>Panulirus gracilis</i>           | Blue spiny lobster        | 27   | 25   | 28   |
| <i>Panulirus homarus</i>            | Scalloped spiny lobster   | 27   | 27   | 28   |
| <i>Panulirus longipes</i>           | Longlegged spiny lobster  | 27   | 26   | 29   |
| <i>Paphies australis</i>            | Pipi wedge clam           | 20   | 15   | 24   |



| Scientific name                    | Common name                 | TP50 | TP25 | TP75 |
|------------------------------------|-----------------------------|------|------|------|
| <i>Paracentrotus lividus</i>       | Stony sea urchin            | 17   | 14   | 19   |
| <i>Paralabrax humeralis</i>        | Peruvian rock seabass       | 26   | 24   | 28   |
| <i>Paralichthys californicus</i>   | California flounder         | 17   | 14   | 20   |
| <i>Paralichthys dentatus</i>       | Summer flounder             | 15   | 12   | 20   |
| <i>Paralichthys olivaceus</i>      | Bastard halibut             | 20   | 17   | 23   |
| <i>Paralithodes brevipes</i>       | Spiny king crab             | 5    | 4    | 6    |
| <i>Paralithodes camtschaticus</i>  | Red king crab               | 6    | 3    | 9    |
| <i>Paralithodes platypus</i>       | Blue King Crab              | 4    | 3    | 4    |
| <i>Paralomis aculeata</i>          | Red stone crab              | 1    | -1   | 3    |
| <i>Paralomis granulosa</i>         | Softshell red crab          | 10   | 8    | 11   |
| <i>Paralomis spinosissima</i>      | Antarctic stone crab        | 1    | -1   | 3    |
| <i>Paralonchurus peruanus</i>      | Peruvian banded croaker     | 21   | 20   | 22   |
| <i>Parapenaeopsis atlantica</i>    | Guinea shrimp               | 26   | 25   | 27   |
| <i>Parapenaeus longirostris</i>    | Deepwater rose shrimp       | 25   | 23   | 27   |
| <i>Parapercis colias</i>           | Blue cod                    | 13   | 12   | 15   |
| <i>Parapristipoma octolineatum</i> | African striped grunt       | 27   | 26   | 28   |
| <i>Parastromateus niger</i>        | Black pomfret               | 28   | 27   | 28   |
| <i>Paratrachichthys trailli</i>    | Sandpaper fish              | 17   | 16   | 20   |
| <i>Paristiopterus labiosus</i>     | Giant boarfish              | 23   | 18   | 27   |
| <i>Parona signata</i>              | Parona leatherjacket        | 24   | 22   | 26   |
| <i>Parophrys vetula</i>            | English sole                | 10   | 8    | 12   |
| <i>Patagonotothen brevicauda</i>   | Patagonian rockcod          | 10   | 7    | 12   |
| <i>Patagonotothen ramsayi</i>      | Ramsay's icefish            | 10   | 8    | 11   |
| <i>Patinopecten caurinus</i>       | Weathervane scallop         | 8    | 6    | 11   |
| <i>Pecten jacobaeus</i>            | Great Mediterranean scallop | 20   | 19   | 20   |
| <i>Pecten maximus</i>              | Great Atlantic scallop      | 12   | 11   | 15   |
| <i>Pecten novaezelandiae</i>       | New Zealand scallop         | 16   | 15   | 17   |
| <i>Pecten yessoensis</i>           | Yesso scallop               | 18   | 15   | 21   |
| <i>Pegusa lascaris</i>             | Sand sole                   | 26   | 23   | 28   |
| <i>Pelates quadrilineatus</i>      | Fourlined terapon           | 27   | 25   | 29   |
| <i>Pellona ditchela</i>            | Indian pellona              | 28   | 27   | 28   |
| <i>Penaeus aztecus</i>             | Northern brown shrimp       | 20   | 16   | 24   |
| <i>Penaeus brasiliensis</i>        | Redspotted shrimp           | 27   | 26   | 27   |
| <i>Penaeus brevirostris</i>        | Crystal shrimp              | 26   | 23   | 28   |
| <i>Penaeus californiensis</i>      | Yellowleg shrimp            | 25   | 22   | 27   |
| <i>Penaeus chinensis</i>           | Fleshy prawn                | 21   | 20   | 24   |
| <i>Penaeus duorarum</i>            | Northern pink shrimp        | 25   | 23   | 26   |
| <i>Penaeus indicus</i>             | Indian white prawn          | 27   | 27   | 28   |
| <i>Penaeus japonicus</i>           | Kuruma prawn                | 26   | 23   | 28   |
| <i>Penaeus kerathurus</i>          | Caramote prawn              | 23   | 20   | 26   |

| Scientific name                     | Common name                | TP50 | TP25 | TP75 |
|-------------------------------------|----------------------------|------|------|------|
| <i>Penaeus latisulcatus</i>         | Western king prawn         | 26   | 24   | 28   |
| <i>Penaeus merguensis</i>           | Banana prawn               | 28   | 27   | 28   |
| <i>Penaeus monodon</i>              | Giant tiger prawn          | 26   | 23   | 28   |
| <i>Penaeus notialis</i>             | Southern pink shrimp       | 27   | 27   | 27   |
| <i>Penaeus occidentalis</i>         | Western white shrimp       | 26   | 24   | 28   |
| <i>Penaeus paulensis</i>            | Sao Paulo shrimp           | 15   | 13   | 18   |
| <i>Penaeus penicillatus</i>         | Redtail prawn              | 28   | 27   | 28   |
| <i>Penaeus semisulcatus</i>         | Green tiger prawn          | 27   | 26   | 29   |
| <i>Penaeus setiferus</i>            | Northern white shrimp      | 24   | 23   | 25   |
| <i>Penaeus stylirostris</i>         | Blue shrimp                | 25   | 22   | 28   |
| <i>Penaeus vannamei</i>             | Whiteleg shrimp            | 27   | 26   | 28   |
| <i>Pennahia anea</i>                | Greyfin croaker            | 28   | 28   | 28   |
| <i>Pennahia argentata</i>           | White croaker              | 24   | 23   | 26   |
| <i>Pentaceros decacanthus</i>       | Bigspined boarfish         | 20   | 18   | 23   |
| <i>Pentanemus quinquarius</i>       | Royal threadfin            | 26   | 24   | 27   |
| <i>Peprilus simillimus</i>          | Pacific pompano            | 16   | 13   | 20   |
| <i>Peprilus triacanthus</i>         | American butterfish        | 19   | 11   | 23   |
| <i>Percophis brasiliensis</i>       | Brazilian flathead         | 18   | 14   | 22   |
| <i>Perna perna</i>                  | South American rock mussel | 26   | 24   | 28   |
| <i>Perna viridis</i>                | Brown mussel               | 26   | 24   | 28   |
| <i>Petromyzon marinus</i>           | Sea lamprey                | 11   | 6    | 16   |
| <i>Petrus rupestris</i>             | Red steenbras              | 20   | 18   | 21   |
| <i>Phycis blennoides</i>            | Greater forkbeard          | 16   | 12   | 19   |
| <i>Phycis phycis</i>                | Forkbeard                  | 20   | 19   | 20   |
| <i>Pitar rostratus</i>              | Rostrate pitar             | 21   | 20   | 23   |
| <i>Placopecten magellanicus</i>     | American sea scallop       | 8    | 5    | 10   |
| <i>Platichthys flesus</i>           | Flounder                   | 12   | 10   | 15   |
| <i>Platichthys stellatus</i>        | Starry flounder            | 4    | 2    | 8    |
| <i>Platycephalus indicus</i>        | Bartail flathead           | 27   | 27   | 28   |
| <i>Plectorhinchus gaterinus</i>     | Blackspotted rubberlips    | 27   | 26   | 28   |
| <i>Plectorhinchus macrolepis</i>    | Biglip grunt               | 27   | 26   | 27   |
| <i>Plectorhinchus mediterraneus</i> | Rubberlip grunt            | 23   | 20   | 26   |
| <i>Plectorhinchus pictus</i>        | Trout sweetlips            | 28   | 27   | 28   |
| <i>Plectorhinchus schotaf</i>       | Minstrel sweetlip          | 27   | 26   | 29   |
| <i>Plectropomus areolatus</i>       | Squaretail coral grouper   | 28   | 27   | 28   |
| <i>Plectropomus pessuliferus</i>    | Roving coral grouper       | 28   | 27   | 29   |
| <i>Pleoticus muelleri</i>           | Argentine red shrimp       | 14   | 12   | 16   |
| <i>Pleoticus robustus</i>           | Royal red shrimp           | 25   | 22   | 27   |
| <i>Plesiopenaeus edwardsianus</i>   | Scarlet shrimp             | 25   | 23   | 27   |
| <i>Pleuragramma antarcticum</i>     | Antarctic silverfish       | -2   | -2   | -2   |



| Scientific name                        | Common name             | TP50 | TP25 | TP75 |
|----------------------------------------|-------------------------|------|------|------|
| <i>Pleurogrammus azonus</i>            | Okhostk atka mackerel   | 10   | 6    | 15   |
| <i>Pleuroncodes monodon</i>            | Squat Lobster           | 17   | 15   | 19   |
| <i>Pleuroncodes planipes</i>           | Pelagic red crab        | 25   | 23   | 27   |
| <i>Pleuronectes platessus</i>          | European plaice         | 12   | 9    | 15   |
| <i>Pleuronectes quadrituberculatus</i> | Alaska plaice           | 4    | 2    | 5    |
| <i>Pleuronichthys decurrens</i>        | Curlfin sole            | 14   | 10   | 18   |
| <i>Pogonias cromis</i>                 | Black drum              | 24   | 22   | 27   |
| <i>Pogonophryne permitini</i>          | Pogonophryne permitini  | -2   | -2   | -2   |
| <i>Pollachius pollachius</i>           | Pollack                 | 10   | 9    | 12   |
| <i>Pollachius virens</i>               | Saithe                  | 8    | 4    | 11   |
| <i>Pollicipes pollicipes</i>           | Barnacle                | 19   | 18   | 20   |
| <i>Polydactylus quadrifilis</i>        | Giant African threadfin | 27   | 26   | 27   |
| <i>Polyprion americanus</i>            | Wreckfish               | 18   | 15   | 21   |
| <i>Polyprion oxygeneios</i>            | Hapuka                  | 17   | 15   | 18   |
| <i>Pomacanthus maculosus</i>           | Yellowbar angelfish     | 27   | 26   | 28   |
| <i>Pomadasy s argenteus</i>            | Silver grunt            | 27   | 26   | 29   |
| <i>Pomadasy s incisus</i>              | Bastard grunt           | 27   | 25   | 28   |
| <i>Pomadasy s jubelini</i>             | Sompat grunt            | 26   | 25   | 27   |
| <i>Pomadasy s kaakan</i>               | Javelin grunter         | 27   | 26   | 29   |
| <i>Pomadasy s stridens</i>             | Striped piggy           | 27   | 26   | 28   |
| <i>Pomatomus saltator</i>              | Bluefish                | 27   | 25   | 28   |
| <i>Pontinus kuhlii</i>                 | Offshore rockfish       | 27   | 25   | 28   |
| <i>Portunus pelagicus</i>              | Blue swimming crab      | 27   | 26   | 29   |
| <i>Portunus trituberculatus</i>        | Gazami crab             | 26   | 24   | 28   |
| <i>Priacanthus macracanthus</i>        | Red bigeye              | 28   | 27   | 28   |
| <i>Prionace glauca</i>                 | Blue shark              | 23   | 18   | 26   |
| <i>Prolatilus jugularis</i>            | Tilefish                | 16   | 14   | 18   |
| <i>Promethichthys prometheus</i>       | Roudi escolar           | 26   | 24   | 28   |
| <i>Protothaca staminea</i>             | Pacific littleneck clam | 8    | 6    | 11   |
| <i>Protothaca thaca</i>                | Taca clam               | 19   | 15   | 23   |
| <i>Psenopsis anomala</i>               | Melon seed              | 22   | 21   | 24   |
| <i>Psettichthys melanostictus</i>      | West American sand sole | 10   | 7    | 11   |
| <i>Psettodes belcheri</i>              | Spottail spiny turbot   | 27   | 25   | 27   |
| <i>Psettodes erumei</i>                | Indian spiny turbot     | 28   | 27   | 29   |
| <i>Pseudocaranx dentex</i>             | White trevally          | 20   | 18   | 23   |
| <i>Pseudochaenichthys georgianus</i>   | South Georgia icefish   | -1   | -1   | 0    |
| <i>Pseudocyttus maculatus</i>          | Smooth oreo             | 12   | 6    | 17   |
| <i>Pseudopentaceros richardsoni</i>    | Pelagic armorhead       | 17   | 16   | 18   |
| <i>Pseudopercis semifasciata</i>       | Pigletfish              | 14   | 12   | 16   |
| <i>Pseudophycis bachus</i>             | Red codling             | 14   | 13   | 15   |

| Scientific name                        | Common name            | TP50 | TP25 | TP75 |
|----------------------------------------|------------------------|------|------|------|
| <i>Pseudopleuronectes americanus</i>   | Winter flounder        | 10   | 8    | 12   |
| <i>Pseudopleuronectes herzensteini</i> | Littlemouth flounder   | 12   | 9    | 15   |
| <i>Pseudotolithus elongatus</i>        | Bobo croaker           | 26   | 26   | 27   |
| <i>Pseudotolithus senegalensis</i>     | Cassava croaker        | 26   | 25   | 27   |
| <i>Pseudotolithus senegallus</i>       | Law croaker            | 27   | 25   | 27   |
| <i>Pseudupeneus prayensis</i>          | West African goatfish  | 27   | 26   | 28   |
| <i>Pterogymnus lanarius</i>            | Panga seabream         | 20   | 18   | 24   |
| <i>Pteroscion peli</i>                 | Boe drum               | 25   | 24   | 27   |
| <i>Pterothrissus belloci</i>           | Longfin bonefish       | 25   | 24   | 27   |
| <i>Pterygotrigla polyommata</i>        | Latchet                | 17   | 16   | 18   |
| <i>Pyura chilensis</i>                 | Red sea squirt         | 12   | 11   | 13   |
| <i>Pyura stolonifera</i>               | Red bait               | 17   | 15   | 18   |
| <i>Rachycentron canadum</i>            | Cobia                  | 27   | 25   | 28   |
| <i>Raja asterias</i>                   | Starry ray             | 15   | 12   | 17   |
| <i>Raja brachyura</i>                  | Blonde ray             | 15   | 9    | 20   |
| <i>Raja clavata</i>                    | Thornback ray          | 17   | 14   | 20   |
| <i>Raja microocellata</i>              | Small-eyed ray         | 14   | 12   | 16   |
| <i>Raja montagui</i>                   | Spotted ray            | 14   | 9    | 20   |
| <i>Raja undulata</i>                   | Undulate ray           | 18   | 12   | 23   |
| <i>Rastrelliger brachysoma</i>         | Short mackerel         | 28   | 28   | 28   |
| <i>Rastrelliger kanagurta</i>          | Indian mackerel        | 28   | 27   | 28   |
| <i>Regalecus glesne</i>                | King of herrings       | 22   | 18   | 25   |
| <i>Reinhardtius evermanni</i>          | Kamchatka flounder     | 6    | 4    | 10   |
| <i>Reinhardtius hippoglossoides</i>    | Greenland halibut      | 6    | 4    | 9    |
| <i>Rexea solandri</i>                  | Silver gemfish         | 17   | 15   | 18   |
| <i>Rhabdosargus globiceps</i>          | White stumpnose        | 21   | 19   | 25   |
| <i>Rhabdosargus haffara</i>            | Haffara seabream       | 27   | 25   | 28   |
| <i>Rhinobatos percellens</i>           | Chola guitarfish       | 26   | 25   | 28   |
| <i>Rhinobatos planiceps</i>            | Pacific guitarfish     | 24   | 22   | 26   |
| <i>Rhinochimaera atlantica</i>         | Spearnose chimaera     | 25   | 23   | 28   |
| <i>Rhomboplites aurorubens</i>         | Vermilion snapper      | 27   | 26   | 27   |
| <i>Rhynchobatus djiddensis</i>         | Giant guitarfish       | 27   | 26   | 29   |
| <i>Ruditapes decussatus</i>            | Grooved carpet shell   | 17   | 13   | 22   |
| <i>Ruditapes philippinarum</i>         | Japanese carpet shell  | 18   | 16   | 20   |
| <i>Ruvettus pretiosus</i>              | Oilfish                | 25   | 22   | 28   |
| <i>Salilota australis</i>              | Tadpole codling        | 9    | 8    | 11   |
| <i>Salmo salar</i>                     | Atlantic salmon        | 9    | 6    | 12   |
| <i>Salmo trutta</i>                    | Sea trout              | 9    | 9    | 10   |
| <i>Salvelinus alpinus</i>              | Charr                  | 1    | 0    | 3    |
| <i>Sarda chiliensis</i>                | Eastern Pacific bonito | 19   | 19   | 19   |

| Scientific name                    | Common name                    | TP50 | TP25 | TP75 |
|------------------------------------|--------------------------------|------|------|------|
| <i>Sarda orientalis</i>            | Striped bonito                 | 28   | 27   | 28   |
| <i>Sarda sarda</i>                 | Atlantic bonito                | 23   | 18   | 26   |
| <i>Sardina pilchardus</i>          | European pilchard              | 16   | 13   | 19   |
| <i>Sardinella aurita</i>           | Round sardinella               | 25   | 22   | 27   |
| <i>Sardinella brasiliensis</i>     | Brazilian sardinella           | 26   | 25   | 27   |
| <i>Sardinella gibbosa</i>          | Goldstripe sardinella          | 28   | 28   | 28   |
| <i>Sardinella lemuru</i>           | Bali sardinella                | 28   | 27   | 29   |
| <i>Sardinella longiceps</i>        | Indian oil sardine             | 28   | 27   | 28   |
| <i>Sardinella maderensis</i>       | Madeiran sardinella            | 24   | 21   | 26   |
| <i>Sardinella zunasi</i>           | Japanese sardinella            | 22   | 19   | 24   |
| <i>Sardinops sagax</i>             | South American pilchard        | 22   | 18   | 25   |
| <i>Sargocentron spiniferum</i>     | Sabre squirrelfish             | 27   | 26   | 29   |
| <i>Sarpa salpa</i>                 | Salema                         | 25   | 23   | 28   |
| <i>Saurida tumbil</i>              | Greater lizardfish             | 28   | 27   | 28   |
| <i>Saurida undosquamis</i>         | Brushtooth lizardfish          | 27   | 24   | 28   |
| <i>Saxidomus giganteus</i>         | Butter clam                    | 7    | 5    | 9    |
| <i>Scapharca subcrenata</i>        | Half-crenated ark              | 20   | 18   | 22   |
| <i>Scarus ghobban</i>              | Blue-barred parrotfish         | 27   | 26   | 29   |
| <i>Scarus persicus</i>             | Gulf parrotfish                | 26   | 26   | 27   |
| <i>Schedophilus ovalis</i>         | Imperial blackfish             | 25   | 22   | 27   |
| <i>Schedophilus pamarco</i>        | Pamarco blackfish              | 26   | 25   | 27   |
| <i>Sciaena umbra</i>               | Brown meagre                   | 19   | 14   | 23   |
| <i>Sciaenops ocellatus</i>         | Red drum                       | 26   | 24   | 28   |
| <i>Scolopsis taeniatus</i>         | Black-streaked monocle bream   | 27   | 26   | 27   |
| <i>Scomber australasicus</i>       | Blue mackerel                  | 24   | 20   | 27   |
| <i>Scomber japonicus</i>           | Chub mackerel                  | 23   | 18   | 27   |
| <i>Scomber scombrus</i>            | Atlantic mackerel              | 12   | 8    | 16   |
| <i>Scomberesox saurus</i>          | Atlantic saury                 | 20   | 14   | 24   |
| <i>Scomberoides commersonianus</i> | Talang queenfish               | 28   | 27   | 28   |
| <i>Scomberoides lysan</i>          | Doublespotted queenfish        | 28   | 27   | 28   |
| <i>Scomberoides tol</i>            | Needlescaled queenfish         | 28   | 27   | 28   |
| <i>Scomberomorus brasiliensis</i>  | Serra Spanish mackerel         | 27   | 27   | 27   |
| <i>Scomberomorus cavalla</i>       | King mackerel                  | 25   | 22   | 27   |
| <i>Scomberomorus commerson</i>     | Narrow-barred Spanish mackerel | 28   | 27   | 28   |
| <i>Scomberomorus guttatus</i>      | Indo-Pacific king mackerel     | 28   | 27   | 29   |
| <i>Scomberomorus lineolatus</i>    | Streaked seerfish              | 28   | 28   | 28   |
| <i>Scomberomorus maculatus</i>     | Spanish mackerel               | 24   | 22   | 26   |
| <i>Scomberomorus niphonius</i>     | Japanese Spanish mackerel      | 18   | 15   | 20   |
| <i>Scomberomorus regalis</i>       | Cero                           | 25   | 23   | 27   |
| <i>Scomberomorus sierra</i>        | Pacific sierra                 | 25   | 22   | 27   |

| Scientific name                   | Common name                   | TP50 | TP25 | TP75 |
|-----------------------------------|-------------------------------|------|------|------|
| <i>Scomberomorus tritor</i>       | West African Spanish mackerel | 24   | 22   | 26   |
| <i>Scophthalmus aquosus</i>       | Windowpane                    | 11   | 9    | 13   |
| <i>Scophthalmus maximus</i>       | Turbot                        | 11   | 9    | 14   |
| <i>Scophthalmus rhombus</i>       | Brill                         | 11   | 7    | 14   |
| <i>Scorpaena porcus</i>           | Black scorpionfish            | 18   | 16   | 20   |
| <i>Scorpaena scrofa</i>           | Largescaled scorpionfish      | 25   | 23   | 28   |
| <i>Scorpaenichthys marmoratus</i> | Cabezón                       | 13   | 8    | 18   |
| <i>Scyliorhinus canicula</i>      | Smallspotted catshark         | 17   | 10   | 22   |
| <i>Scyliorhinus stellaris</i>     | Nursehound                    | 16   | 10   | 22   |
| <i>Scylla serrata</i>             | Indo-Pacific swamp crab       | 26   | 24   | 28   |
| <i>Scyllarides latus</i>          | Mediterranean slipper lobster | 19   | 19   | 20   |
| <i>Scymnodon ringens</i>          | Knifetooth dogfish            | 18   | 16   | 20   |
| <i>Sebastes alutus</i>            | Pacific ocean perch           | 6    | 5    | 10   |
| <i>Sebastes entomelas</i>         | Widow rockfish                | 9    | 6    | 11   |
| <i>Sebastes flavidus</i>          | Yellowtail rockfish           | 11   | 7    | 16   |
| <i>Sebastes goodei</i>            | Chilipepper                   | 16   | 11   | 20   |
| <i>Sebastes marinus</i>           | Ocean perch                   | 5    | 3    | 6    |
| <i>Sebastes melanops</i>          | Black rockfish                | 11   | 7    | 15   |
| <i>Sebastes mentella</i>          | Deepwater redfish             | 4    | 2    | 7    |
| <i>Sebastes paucispinis</i>       | Bocaccio                      | 8    | 5    | 11   |
| <i>Sebastes pinniger</i>          | Canary rockfish               | 8    | 5    | 11   |
| <i>Sebastes viviparus</i>         | Norway redfish                | 9    | 9    | 9    |
| <i>Sebastolobus alascanus</i>     | Shortspine thornyhead         | 6    | 4    | 10   |
| <i>Selar crumenophthalmus</i>     | Bigeye scad                   | 27   | 26   | 29   |
| <i>Selaroides leptolepis</i>      | Yellowstripe scad             | 28   | 27   | 28   |
| <i>Selene dorsalis</i>            | African moonfish              | 24   | 22   | 26   |
| <i>Selene setapinnis</i>          | Atlantic moonfish             | 26   | 24   | 28   |
| <i>Semele solida</i>              | Chilean semele                | 12   | 11   | 14   |
| <i>Semicossyphus pulcher</i>      | California sheephead          | 22   | 19   | 25   |
| <i>Sepia officinalis</i>          | Common cuttlefish             | 19   | 15   | 23   |
| <i>Seriola dumerili</i>           | Greater amberjack             | 27   | 26   | 28   |
| <i>Seriola lalandi</i>            | Yellowtail amberjack          | 26   | 24   | 28   |
| <i>Seriolella brama</i>           | Common warehou                | 15   | 13   | 16   |
| <i>Seriolella caerulea</i>        | White warehou                 | 13   | 10   | 16   |
| <i>Seriolella porosa</i>          | Choicy ruff                   | 17   | 16   | 19   |
| <i>Seriolella punctata</i>        | Silver warehou                | 15   | 13   | 16   |
| <i>Seriolina nigrofasciata</i>    | Blackbanded trevally          | 27   | 26   | 29   |
| <i>Serranus cabrilla</i>          | Comber                        | 23   | 20   | 27   |
| <i>Sicyonia brevirostris</i>      | Rock shrimp                   | 25   | 23   | 27   |
| <i>Sicyonia ingentis</i>          | Ridgeback shrimp              | 19   | 17   | 21   |

| Scientific name                   | Common name                 | TP50 | TP25 | TP75 |
|-----------------------------------|-----------------------------|------|------|------|
| <i>Siliqua patula</i>             | Pacific razor clam          | 7    | 5    | 9    |
| <i>Sillago sihama</i>             | Silver sillago              | 27   | 26   | 28   |
| <i>Solea senegalensis</i>         | Senegalese sole             | 21   | 16   | 25   |
| <i>Solea solea</i>                | Common sole                 | 16   | 12   | 19   |
| <i>Solen vagina</i>               | European razor clam         | 10   | 7    | 15   |
| <i>Solenocera agassizii</i>       | Kolibri shrimp              | 26   | 24   | 27   |
| <i>Somniosus microcephalus</i>    | Greenland shark             | 7    | 3    | 10   |
| <i>Somniosus rostratus</i>        | Little sleeper shark        | 26   | 24   | 28   |
| <i>Sparus auratus</i>             | Gilthead seabream           | 26   | 22   | 28   |
| <i>Spectrunculus grandis</i>      | Pudgy cuskeel               | 22   | 18   | 26   |
| <i>Sphoeroides maculatus</i>      | Northern puffer             | 12   | 8    | 18   |
| <i>Sphyraena barracuda</i>        | Great barracuda             | 27   | 26   | 28   |
| <i>Sphyraena jello</i>            | Pickhandle barracuda        | 27   | 25   | 29   |
| <i>Sphyraena obtusata</i>         | Obtuse barracuda            | 28   | 27   | 28   |
| <i>Sphyrna lewini</i>             | Scalloped hammerhead        | 27   | 25   | 28   |
| <i>Sphyrna zygaena</i>            | Smooth hammerhead           | 25   | 22   | 28   |
| <i>Spicara maena</i>              | Blotched picarel            | 16   | 12   | 19   |
| <i>Spisula ovalis</i>             | Venus clam                  | 11   | 10   | 12   |
| <i>Spisula polynyma</i>           | Stimpsons surf clam         | 4    | 2    | 6    |
| <i>Spisula solida</i>             | Surf clam                   | 11   | 9    | 12   |
| <i>Spisula solidissima</i>        | Atlantic surf clam          | 14   | 9    | 20   |
| <i>Spondyliosoma cantharus</i>    | Black seabream              | 19   | 14   | 23   |
| <i>Spratelloides gracilis</i>     | Silverstriped round herring | 28   | 28   | 28   |
| <i>Sprattus fuegensis</i>         | Falkland sprat              | 9    | 8    | 11   |
| <i>Sprattus sprattus</i>          | European sprat              | 12   | 9    | 16   |
| <i>Sprattus sprattus balticus</i> | Baltic sprat                | 9    | 8    | 10   |
| <i>Squalus acanthias</i>          | Piked dogfish               | 16   | 10   | 19   |
| <i>Squatina argentina</i>         | Argentine angelshark        | 13   | 11   | 15   |
| <i>Squatina squatina</i>          | Angelshark                  | 15   | 12   | 18   |
| <i>Squilla mantis</i>             | Spottail mantis squillid    | 22   | 19   | 25   |
| <i>Stenotomus chrysops</i>        | Scup                        | 20   | 16   | 23   |
| <i>Stephanolepis cirrhifer</i>    | Thread-sail filefish        | 22   | 21   | 23   |
| <i>Stereolepis gigas</i>          | Giant sea-bass              | 22   | 18   | 25   |
| <i>Strangomera bentincki</i>      | Araucanian herring          | 13   | 13   | 14   |
| <i>Stromateus fiatola</i>         | Blue butterfish             | 25   | 23   | 28   |
| <i>Symphodus melops</i>           | Corkwing wrasse             | 12   | 7    | 16   |
| <i>Synagrops japonicus</i>        | Japanese splitfin           | 27   | 25   | 28   |
| <i>Takifugu vermicularis</i>      | Pear puffer                 | 14   | 13   | 16   |
| <i>Tapes pullastra</i>            | Pullet carpet shell         | 13   | 10   | 16   |
| <i>Tapes rhomboides</i>           | Banded carpet shell         | 13   | 10   | 17   |

| Scientific name                   | Common name                  | TP50 | TP25 | TP75 |
|-----------------------------------|------------------------------|------|------|------|
| <i>Tautoga onitis</i>             | Tautog                       | 14   | 11   | 17   |
| <i>Tautoglabrus adspersus</i>     | Cunner                       | 7    | 6    | 9    |
| <i>Tawera gayi</i>                | Gay's little venus           | 12   | 11   | 12   |
| <i>Tenualosa ilisha</i>           | Hilsa shad                   | 27   | 26   | 28   |
| <i>Tenualosa toli</i>             | Toli shad                    | 28   | 28   | 28   |
| <i>Tetrapturus albidus</i>        | Atlantic white marlin        | 25   | 23   | 27   |
| <i>Tetrapturus angustirostris</i> | Shortbill spearfish          | 27   | 25   | 28   |
| <i>Tetrapturus audax</i>          | Striped marlin               | 27   | 24   | 28   |
| <i>Tetrapturus pfluegeri</i>      | Longbill spearfish           | 27   | 26   | 27   |
| <i>Thalassoma pavo</i>            | Ornate wrasse                | 22   | 19   | 25   |
| <i>Thaleichthys pacificus</i>     | Eulachon                     | 8    | 5    | 10   |
| <i>Thenus orientalis</i>          | Flathead lobster             | 28   | 27   | 28   |
| <i>Theragra chalcogramma</i>      | Alaska pollack               | 6    | 4    | 8    |
| <i>Thunnus alalunga</i>           | Albacore                     | 23   | 20   | 26   |
| <i>Thunnus albacares</i>          | Yellowfin tuna               | 26   | 24   | 28   |
| <i>Thunnus atlanticus</i>         | Blackfin tuna                | 27   | 26   | 28   |
| <i>Thunnus maccoyii</i>           | Southern bluefin tuna        | 16   | 12   | 19   |
| <i>Thunnus obesus</i>             | Bigeye tuna                  | 26   | 24   | 27   |
| <i>Thunnus orientalis</i>         | Pacific bluefin tuna         | 26   | 22   | 28   |
| <i>Thunnus thynnus</i>            | Northern bluefin tuna        | 24   | 19   | 27   |
| <i>Thunnus tonggol</i>            | Longtail tuna                | 28   | 27   | 28   |
| <i>Thyrsites atun</i>             | Snoek                        | 14   | 11   | 17   |
| <i>Thyrsitops lepidopoides</i>    | White snake mackerel         | 17   | 15   | 20   |
| <i>Tivela mactroides</i>          | Trigonal tivala              | 27   | 26   | 28   |
| <i>Todarodes pacificus</i>        | Japanese flying squid        | 13   | 8    | 19   |
| <i>Todarodes sagittatus</i>       | European flying squid        | 20   | 15   | 24   |
| <i>Tonna galea</i>                | Helmet ton                   | 26   | 24   | 28   |
| <i>Totoaba macdonaldi</i>         | Totoaba                      | 20   | 19   | 21   |
| <i>Trachinotus blochii</i>        | Snubnose pompano             | 28   | 28   | 28   |
| <i>Trachinotus carolinus</i>      | Florida pompano              | 25   | 23   | 27   |
| <i>Trachinotus mookalee</i>       | Indian pompano               | 28   | 28   | 28   |
| <i>Trachinotus ovatus</i>         | Derbio                       | 19   | 13   | 23   |
| <i>Trachinus draco</i>            | Greater weever               | 10   | 6    | 15   |
| <i>Trachurus capensis</i>         | Cape horse mackerel          | 25   | 23   | 27   |
| <i>Trachurus declivis</i>         | Greenback horse mackerel     | 20   | 15   | 24   |
| <i>Trachurus japonicus</i>        | Japanese jack mackerel       | 19   | 15   | 22   |
| <i>Trachurus lathami</i>          | Rough scad                   | 27   | 26   | 28   |
| <i>Trachurus mediterraneus</i>    | Mediterranean horse mackerel | 19   | 18   | 20   |
| <i>Trachurus murphyi</i>          | Inca scad                    | 15   | 12   | 17   |
| <i>Trachurus picturatus</i>       | Blue jack mackerel           | 21   | 18   | 24   |

| Scientific name                   | Common name             | TP50 | TP25 | TP75 |
|-----------------------------------|-------------------------|------|------|------|
| <i>Trachurus symmetricus</i>      | Pacific jack mackerel   | 13   | 9    | 16   |
| <i>Trachurus trachurus</i>        | Atlantic horse mackerel | 18   | 14   | 22   |
| <i>Trachurus trecae</i>           | Cunene horse mackerel   | 25   | 24   | 27   |
| <i>Trachypenaeus curvirostris</i> | Southern rough shrimp   | 27   | 26   | 28   |
| <i>Trachyrincus scabrous</i>      | Roughsnout grenadier    | 21   | 18   | 24   |
| <i>Trematomus eulepidotus</i>     | Blunt scalyhead         | -2   | -2   | -1   |
| <i>Trematomus hansonii</i>        | Striped rockcod         | 1    | 1    | 1    |
| <i>Trichiurus lepturus</i>        | Largehead hairtail      | 25   | 21   | 28   |
| <i>Trigla lyra</i>                | Piper gurnard           | 24   | 20   | 27   |
| <i>Tripteroptychus gilchristi</i> | Grenadier cod           | 22   | 18   | 26   |
| <i>Trisopterus esmarkii</i>       | Norway pout             | 9    | 8    | 11   |
| <i>Trisopterus luscus</i>         | Puting                  | 12   | 10   | 14   |
| <i>Trisopterus minutus</i>        | Poor cod                | 15   | 12   | 18   |
| <i>Turbo cornutus</i>             | Horned turban           | 19   | 18   | 21   |
| <i>Tylosurus crocodilus</i>       | Hound needlefish        | 28   | 27   | 28   |
| <i>Umbrina canariensis</i>        | Canary drum             | 26   | 24   | 28   |
| <i>Umbrina canosai</i>            | Argentine croaker       | 19   | 17   | 21   |
| <i>Umbrina cirrosa</i>            | Shi drum                | 15   | 13   | 18   |
| <i>Upogebia pugettensis</i>       | Blue mud shrimp         | 10   | 9    | 11   |
| <i>Urophycis brasiliensis</i>     | Brazilian codling       | 13   | 10   | 16   |
| <i>Urophycis chuss</i>            | Red hake                | 10   | 8    | 12   |
| <i>Urophycis tenuis</i>           | White hake              | 7    | 5    | 9    |
| <i>Valamugil seheli</i>           | Bluespot mullet         | 28   | 27   | 28   |
| <i>Variola louti</i>              | Yellow-edged lyretail   | 27   | 26   | 29   |
| <i>Venus gallina</i>              | Striped venus           | 14   | 12   | 17   |
| <i>Venus verrucosa</i>            | Warty venus             | 19   | 16   | 23   |
| <i>Xiphias gladius</i>            | Swordfish               | 26   | 23   | 27   |
| <i>Xiphopenaeus kroyeri</i>       | Atlantic seabob         | 26   | 25   | 27   |
| <i>Xiphopenaeus riveti</i>        | Pacific seabob          | 27   | 25   | 28   |
| <i>Zanclorhynchus spinifer</i>    | Spiny horsefish         | 6    | 4    | 9    |
| <i>Zenopsis conchifer</i>         | Silvery John dory       | 25   | 22   | 27   |
| <i>Zenopsis nebulosus</i>         | Mirror dory             | 27   | 24   | 28   |
| <i>Zeus faber</i>                 | John dory               | 23   | 19   | 26   |
| <i>Zidona dufresnei</i>           | Angulate volute         | 17   | 14   | 19   |
| <i>Zoarces americanus</i>         | Ocean pout              | 7    | 6    | 8    |
| <i>Zoarces viviparus</i>          | Viviparous blenny       | 9    | 8    | 10   |
| <i>Zygochlamys delicatula</i>     | Delicate scallop        | 13   | 12   | 15   |
| <i>Zygochlamys patagonica</i>     | Patagonean scallop      | 9    | 8    | 11   |



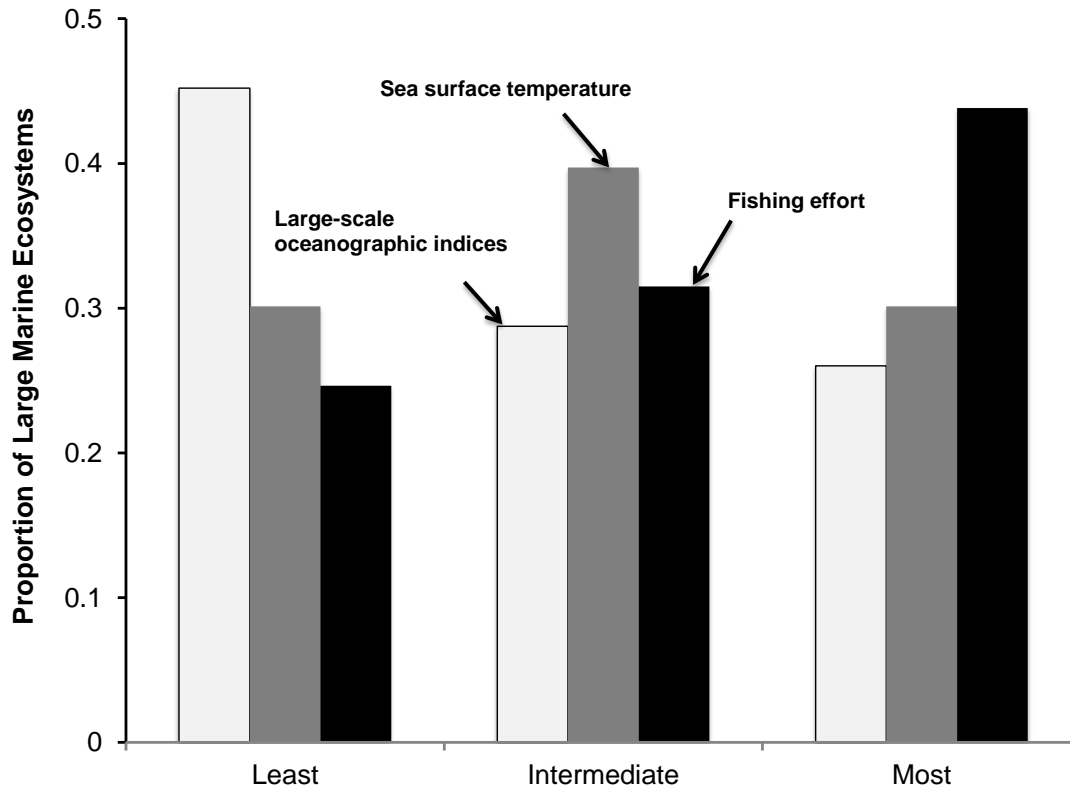

Figure S1. Proportion of LMEs and models with relative ranking of importance of fishing effort, sea surface temperature and large-scale oceanographic indices in explaining the variation of Mean Temperature of the Catch in the 52 LMEs. Importance ranking of each variable is based on the sum of the Akaike weights over all of the models in which the parameter of interest appears



A

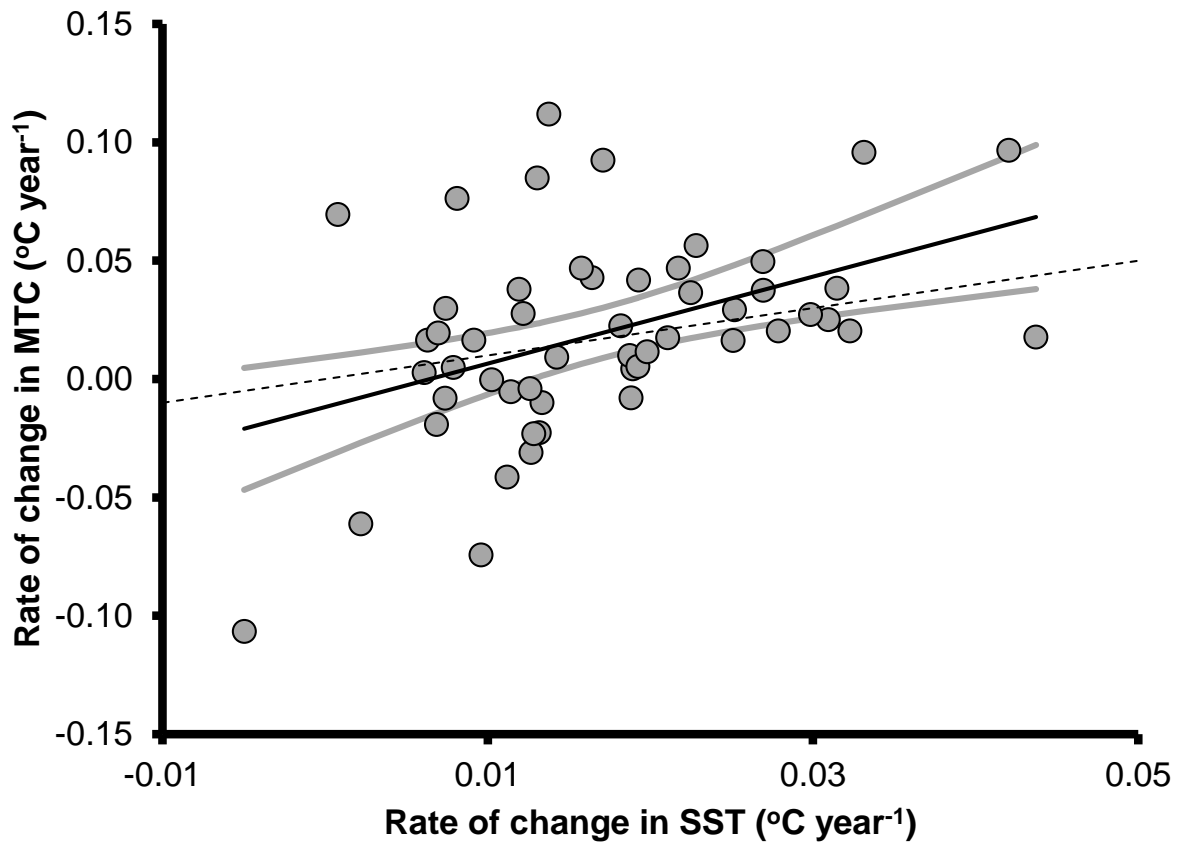

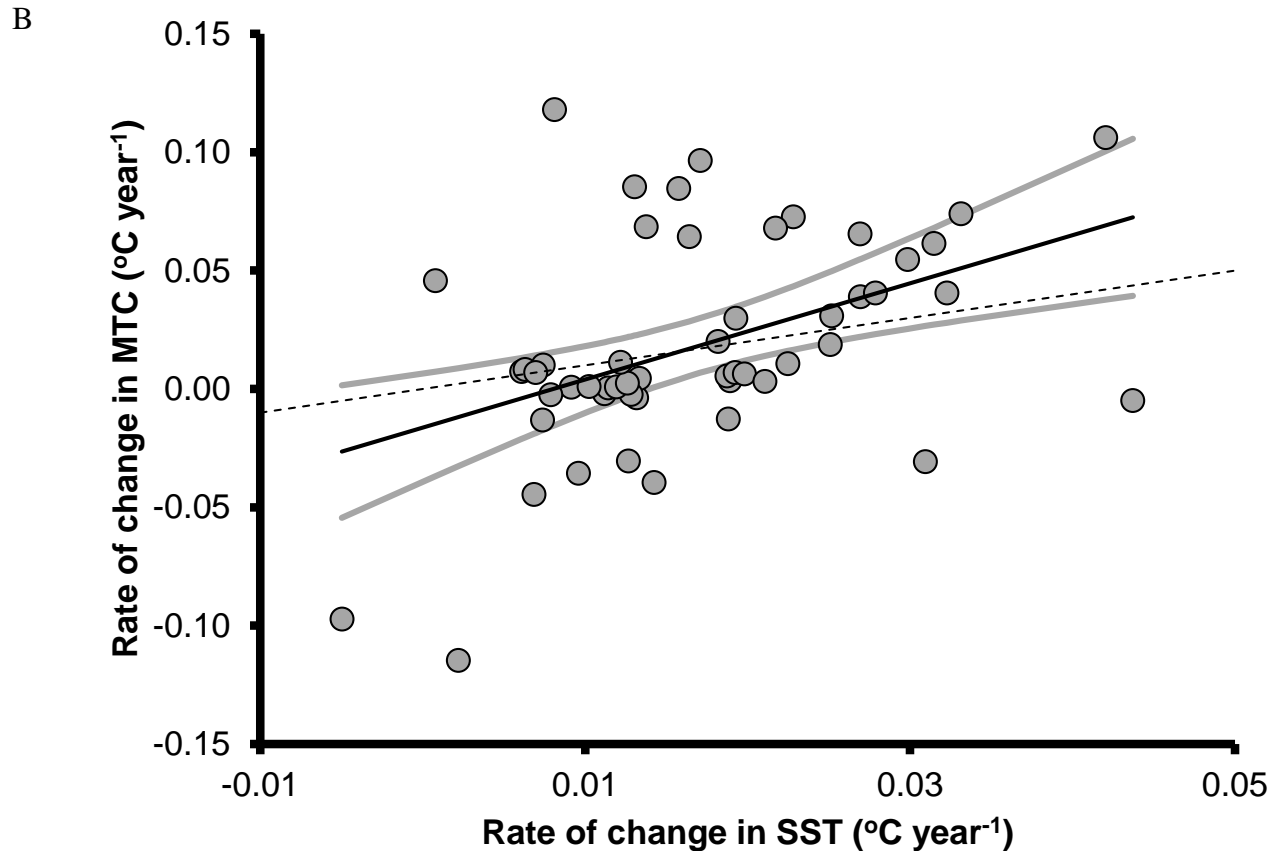

Figure S2. Relationship between rate of changes in Mean Temperature of the Catch (MTC) and Sea Surface Temperature (SST) from 1970 to 2006 in 52 LMEs: (A) calculated using the 25<sup>th</sup> percentile of the temperature preference profile of each species; (B) calculated using the 75<sup>th</sup> percentile of the temperature preference profile of each species. The dotted line represents a 1:1 ratio. The grey lines represent 95% confidence limits.

A.

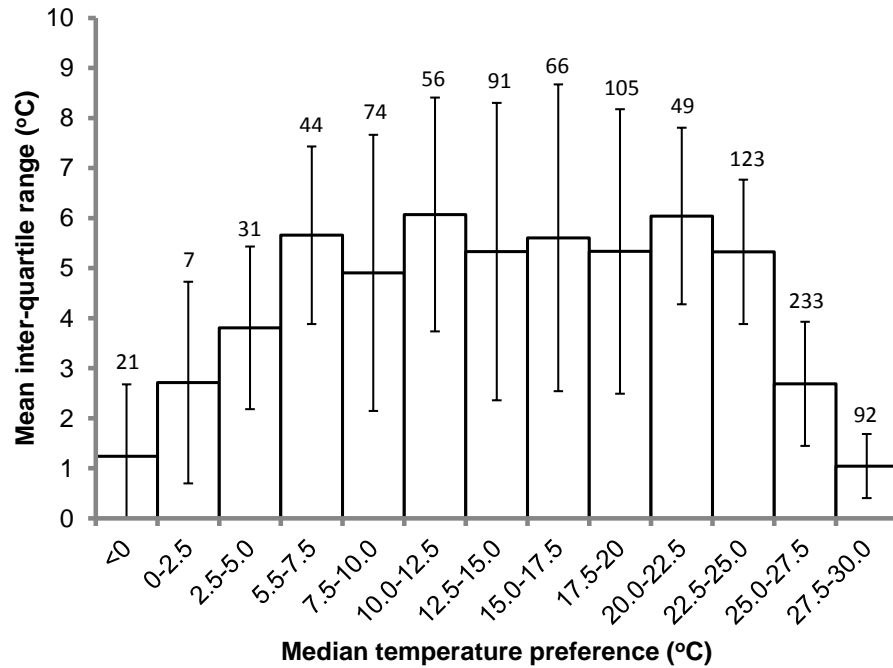

B.

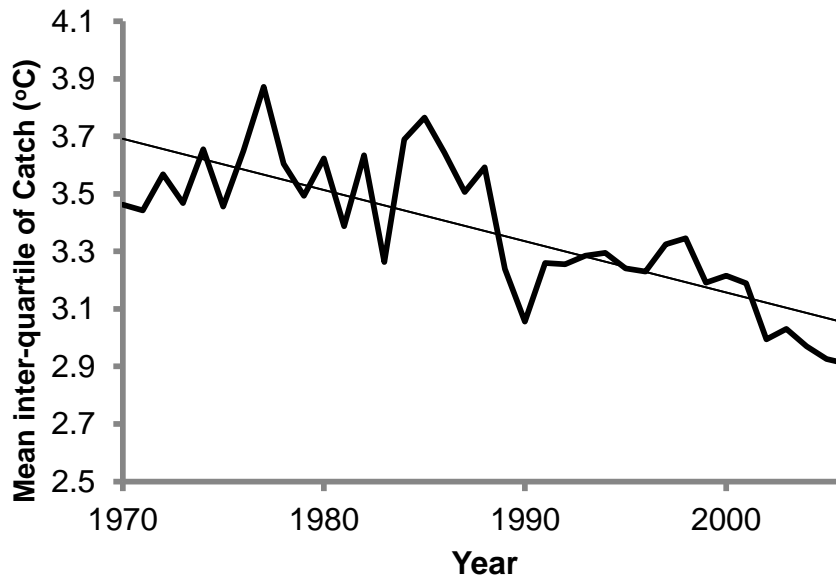

Figure S3. Temperature preference profiles of the species (A) and changes in the temperature preference ranges of tropical species over time (B). The error bars in (A) represent standard deviation across species, on top of which the number of species in each temperature class is specified. The line in (B) is based on a linear regression between mean inter-quartile of catch and time, with a slope of  $-0.0178 \text{ } ^\circ\text{C year}^{-1}$  and an intercept of  $38.8 \text{ } ^\circ\text{C}$ .

## References

- 1 Anticamara, J. A., Watson, R., Gelchu, A. & Pauly, D. Global fishing effort (1950–2010): Trends, gaps, and implications. *Fisheries Research* **107**, 131-136, doi:10.1016/j.fishres.2010.10.016 (2011).
- 2 Close, C. *et al.* in *Fishes in Databases and Ecosystems* Vol. 14(4) (eds D. Palomares, K. I. Stergiou, & D. Pauly) 27-37 (University of British Columbia, 2006).
- 3 Jones, M., Dye, S., Pinnegar, J., Warren, R. & Cheung, W. W. L. Modelling commercial fish distributions: prediction and assessment using different approaches. *Ecological Modelling* **225**, 133-145 (2012).
- 4 Röckmann, C., Dickey-Collas, M., Payne, M. R. & van Hal, R. Realized habitats of early-stage North Sea herring: looking for signals of environmental change. *ICES Journal of Marine Science: Journal du Conseil* **68**, 537-546, doi:10.1093/icesjms/fsq171 (2011).
- 5 Cheung, W. W. L., Lam, V. & Pauly, D. (2008).
- 6 Watson, R. A. *et al.* Global marine yield halved as fishing intensity redoubles. *Fish and Fisheries*, doi:10.1111/j.1467-2979.2012.00483.x (2012).
- 7 Watson, R., Kitchingman, A., Gelchu, A. & Pauly, D. Mapping global fisheries: sharpening our focus. *Fish and Fisheries* **5**, 168-177, doi:10.1111/j.1467-2979.2004.00142.x (2004).
- 8 Zeller, D. *et al.* The Baltic Sea: estimates of total fisheries removals 1950-2007. *Fisheries Research* **108**, 356-363. (2011).
- 9 Zeller, D., Booth, S., Craig, P. & Pauly, D. Reconstruction of coral reef fisheries catches in American Samoa, 1950 – 2002. *Coral Reefs* **25**, 144-152 (2006).

- 10 Frotté, L., Harper, S., Veitch, L., Booth, S. & Zeller, D. in *Fisheries catch reconstructions: Islands, Part I. Fisheries Centre Research Reports 17(5)* (eds D. Zeller & S. Harper) 13-19 (Fisheries Centre, University of British Columbia., 2009).
- 11 Booth, S. & Azar, H. in *Fisheries catch reconstructions: Islands, Part I. Fisheries Centre Research Reports 17 (5)*. (eds D. Zeller & S. Harper) 27-34 (Fisheries Centre, University of British Columbia, 2009).
- 12 Zeller, D., Booth, S., Davis, G. & Pauly, D. Re-estimation of small-scale for U.S. flag-associated islands in the western Pacific: the last 50 years. . *U.S. Fisheries Bulletin* **105**, 266-277 (2007).
- 13 Kaschner, K., Tittensor, D. P., Ready, J., Gerrodette, T. & Worm, B. Current and Future Patterns of Global Marine Mammal Biodiversity. *PLoS ONE* **6**, e19653, doi:10.1371/journal.pone.0019653 (2011).
